# Supplementary material for: Comprehensive study on the degradation of ochratoxin A in water by spectroscopic techniques and DFT calculations
Source: Royal Society of Chemistry journal article supplement (doi:10.1039/c9ra02086a), 2019-01-01
Supplement: c9ra02086a1.pdf [file c9ra02086a1.pdf]

## **Comprehensive study on the degradation of Ochratoxin A in water by spectroscopic techniques and DFT calculations**

Iris Cagnasso, Glauco Tonachini, Silvia Berto, Agnese Giacomino, Luisa Mandrile, Andrea Maranzana, Francesca Durbiano

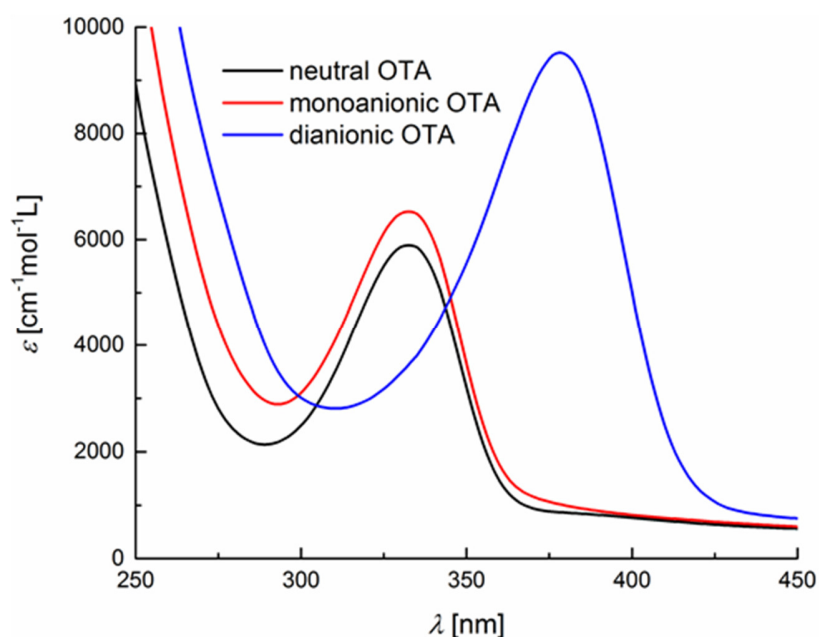

**Figure S1.** Behavior of  $\epsilon$  for the three forms of OTA as a function of  $\lambda$ .

The values of the molar absorptivity ( $\epsilon$ ) for the three OTA forms,  $pK_{a1}$  and  $pK_{a2}$  were deduced by the HypSpec<sup>®</sup> software. The two protonation equilibria had to be considered together to properly model the experimental spectra with the software, because of the correlation between  $pK_{a1}$  and  $pK_{a2}$ . The optimised values of  $pK_a$  derived from the elaboration process are 4.489 and 7.099, with a fit uncertainty of 0.002 and 0.001, respectively. However, the high quality of these elaborations and the very low standard deviations seem to be quite unrealistic, considering the superimposition of the signals of the neutral and the monoanionic forms. For this reason, further evaluations were needed to define more reliable results. In order to verify the stability of the system,  $pK_{a1}$  was fixed at different values and the effect of this constraint on the outcome was evaluated. Ten elaborations with fixed and free  $pK_{a2}$  were tested and the range of  $pK_{a1}$  giving minimum standard deviation was found (4.3 - 4.5). Working in this range, the mean values of the protonation constants, and the corresponding standard deviations, were evaluated:  $pK_{a1} = 4.4 \pm 0.1$  and  $pK_{a2} = 7.09 \pm 0.01$ .

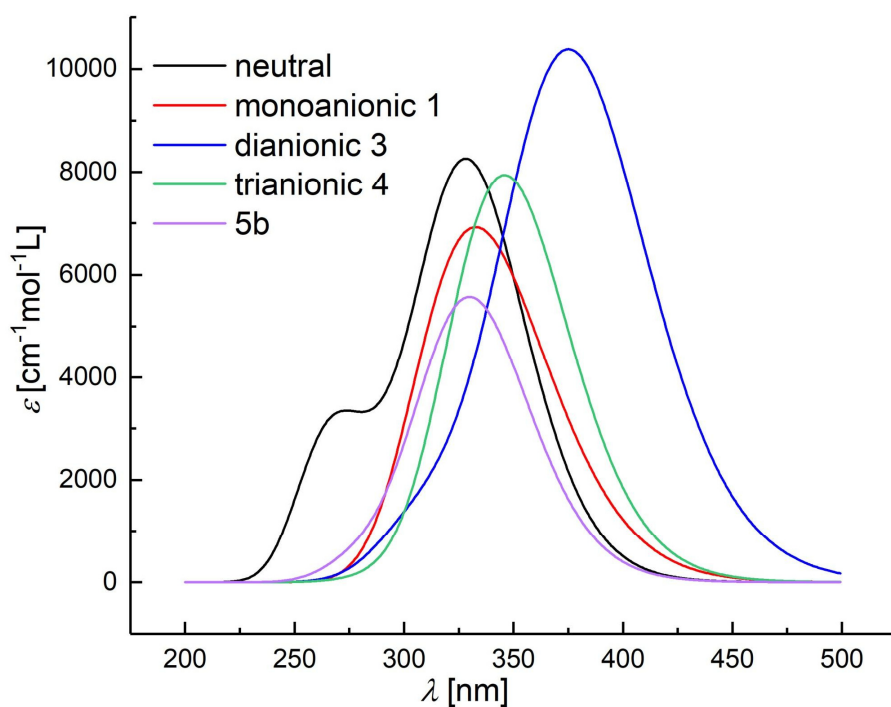

**Figure S2.** TD-DFT UV spectra of OTA.

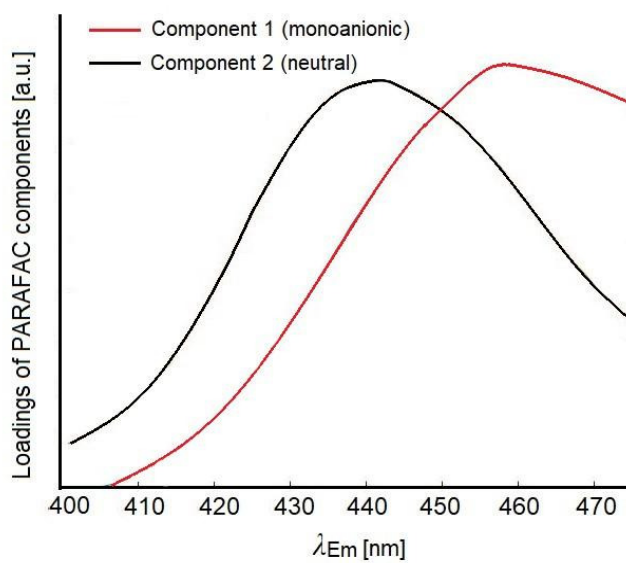

**Figure S3.** Loadings profiles of the two modeled PARAFAC components for the emission mode.

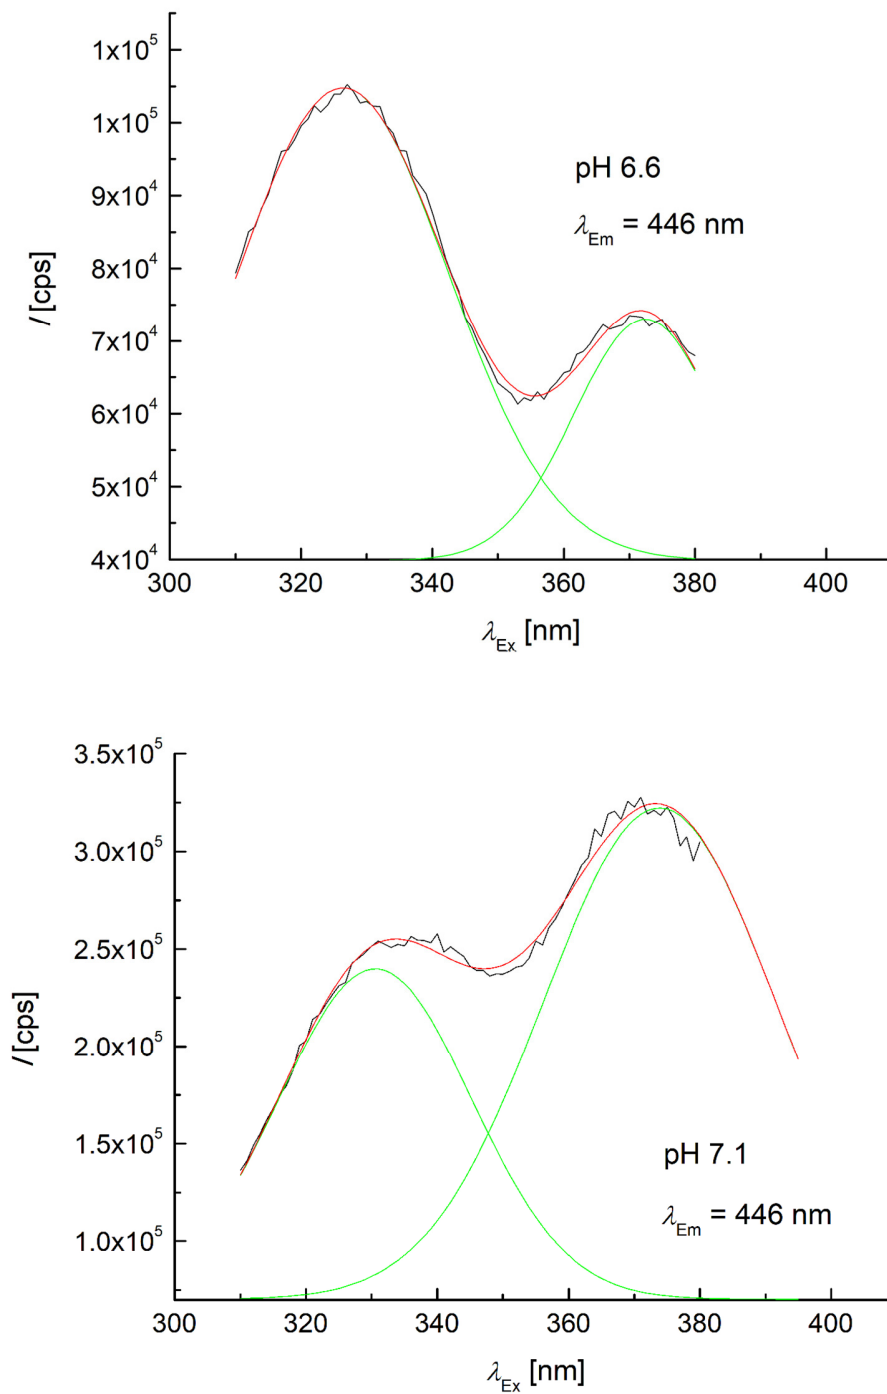

**Figure S4.** Deconvolutions of the excitation spectra extrapolated from the EEMs reported in Figure 3 c and d, at  $\lambda_{Em}$  of 446 nm.

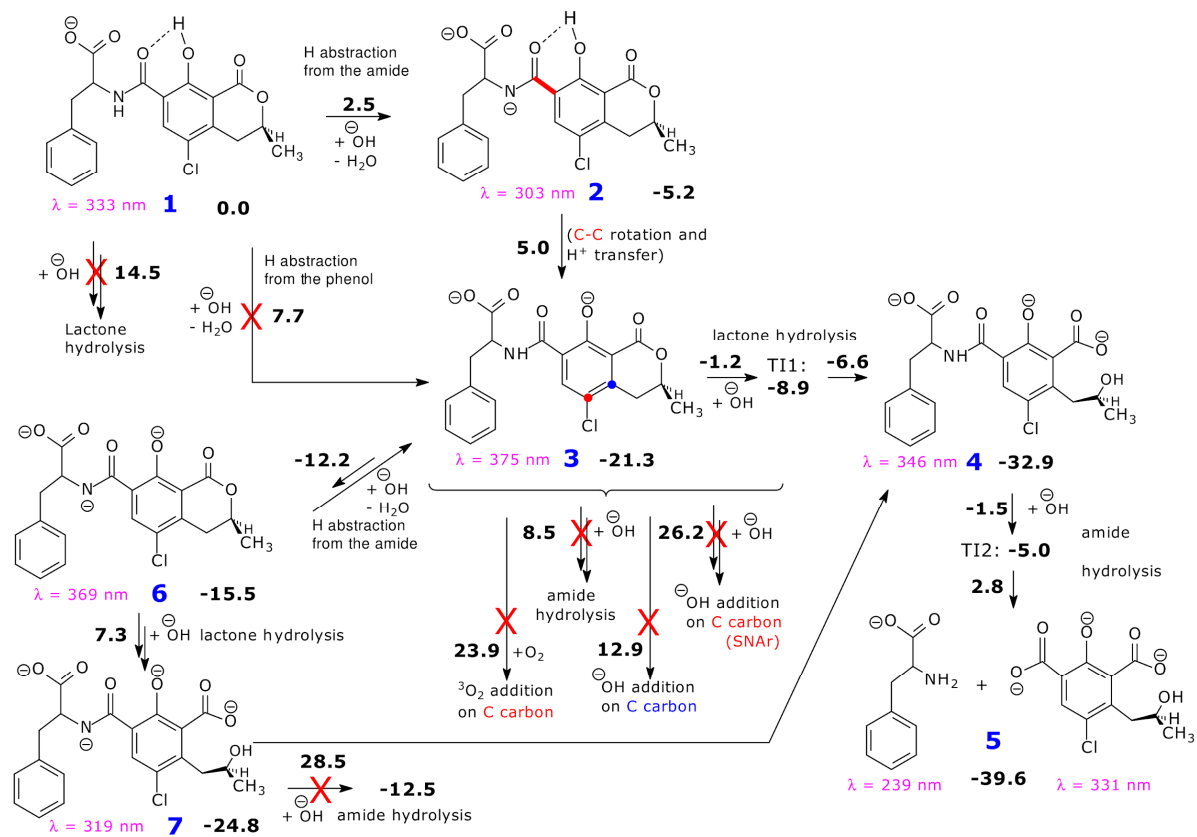

**Scheme S1.** The explored reaction pathways that connect the OTA monoanion **1** to the degradation products **5**.

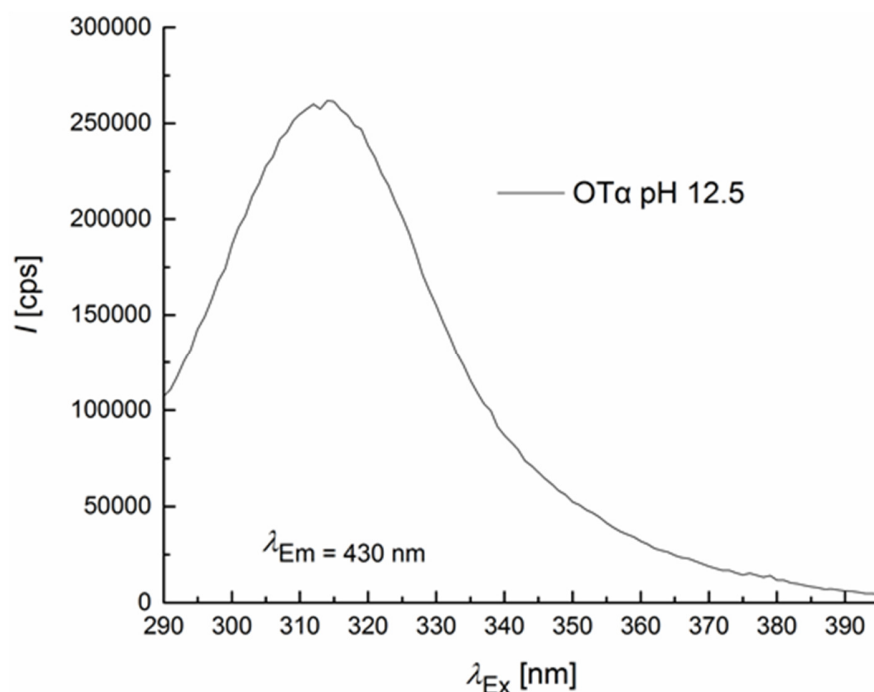

**Figure S5.** Fluorescence excitation spectra of OTα  $1.24 \cdot 10^{-7}$  mol L<sup>-1</sup> at pH 12.5 with  $\lambda_{Em}$  fixed at 430 nm.

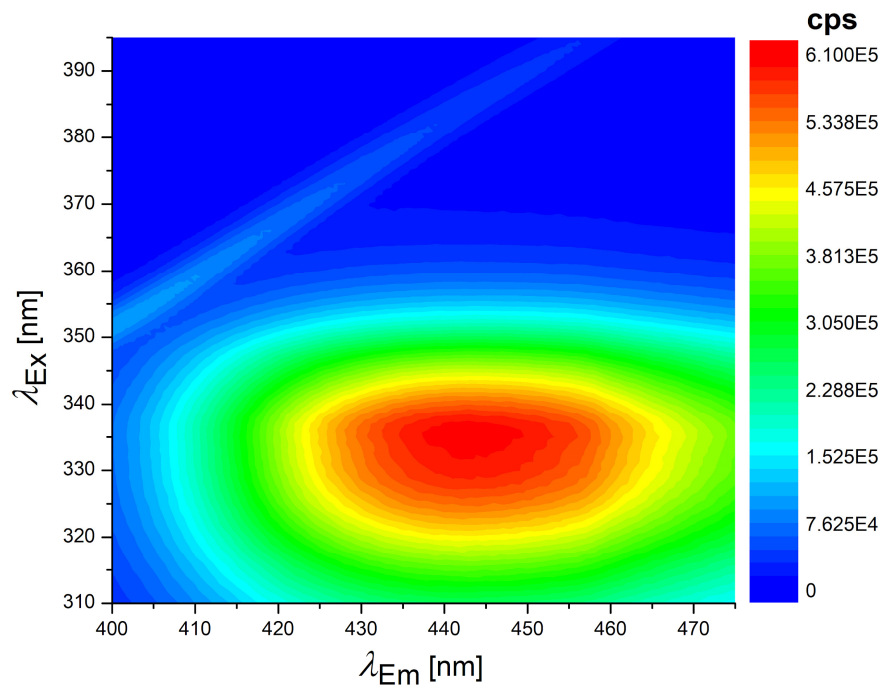

**Figure S6.** EEM of  $1.24 \cdot 10^{-7}$  mol L<sup>-1</sup> OTα solution at pH 1.0.

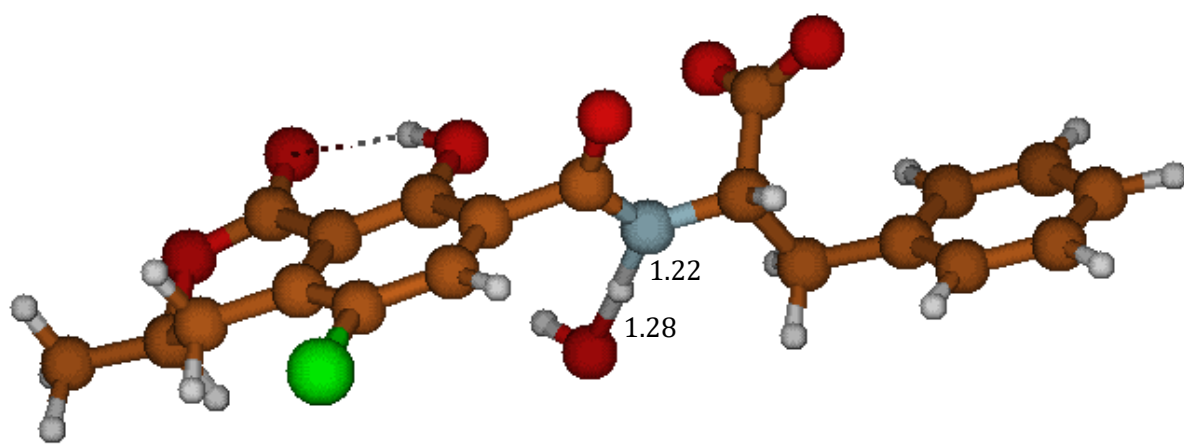

TS 1-2

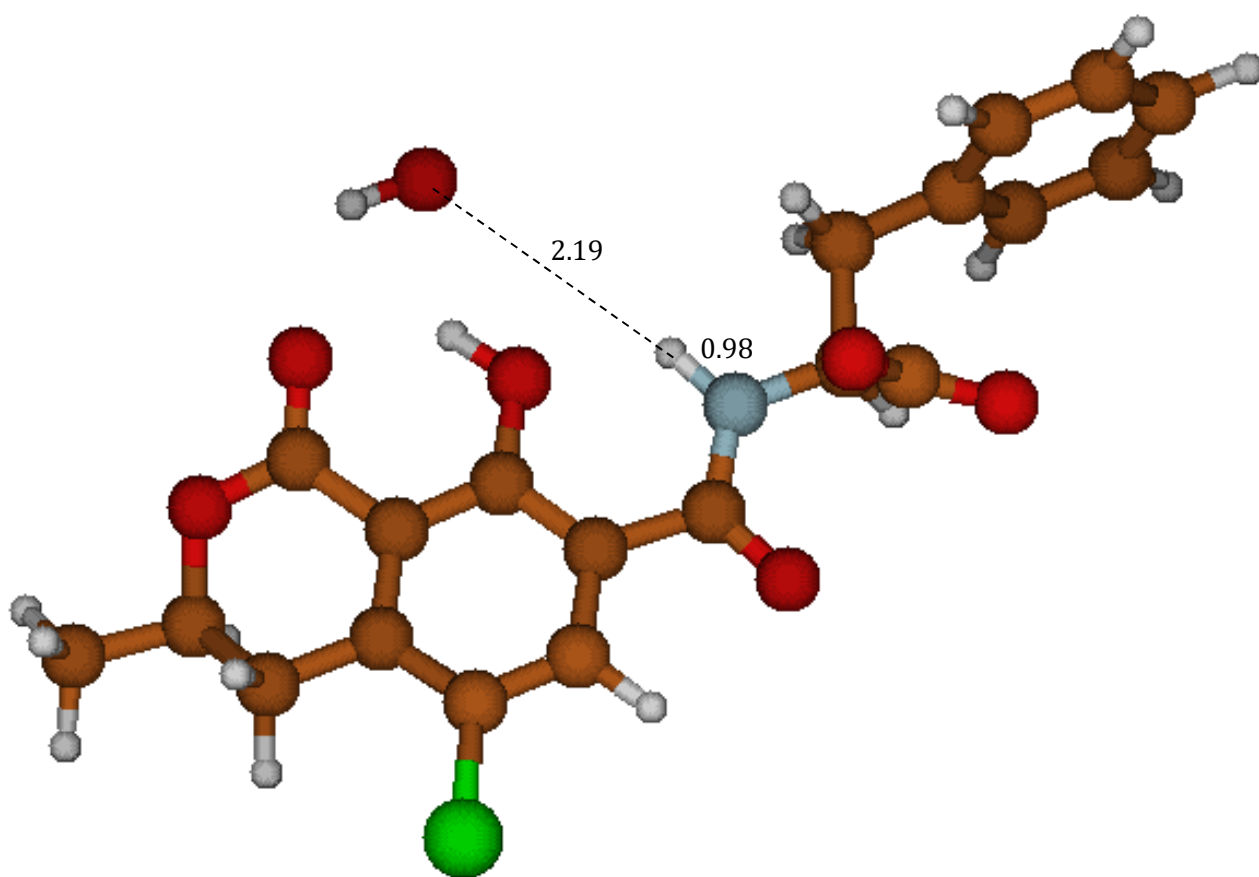

TS 1-3

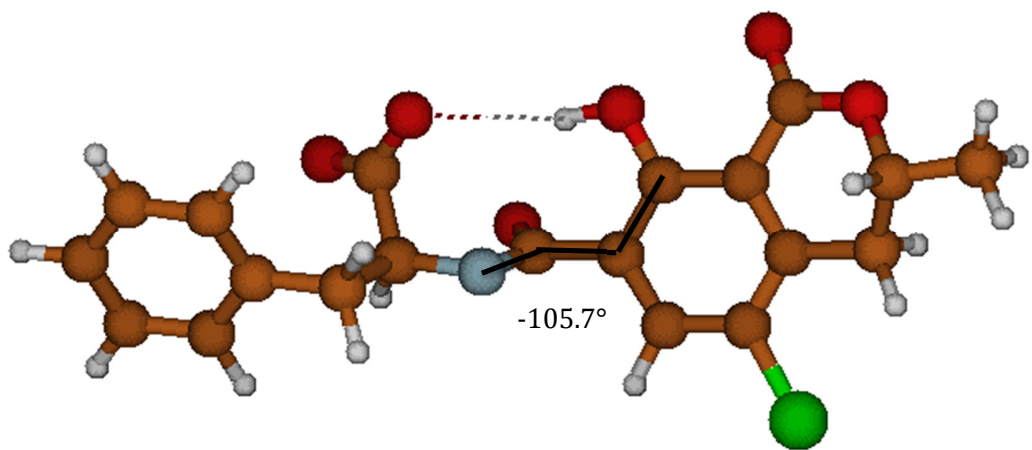

TS 2-3 A

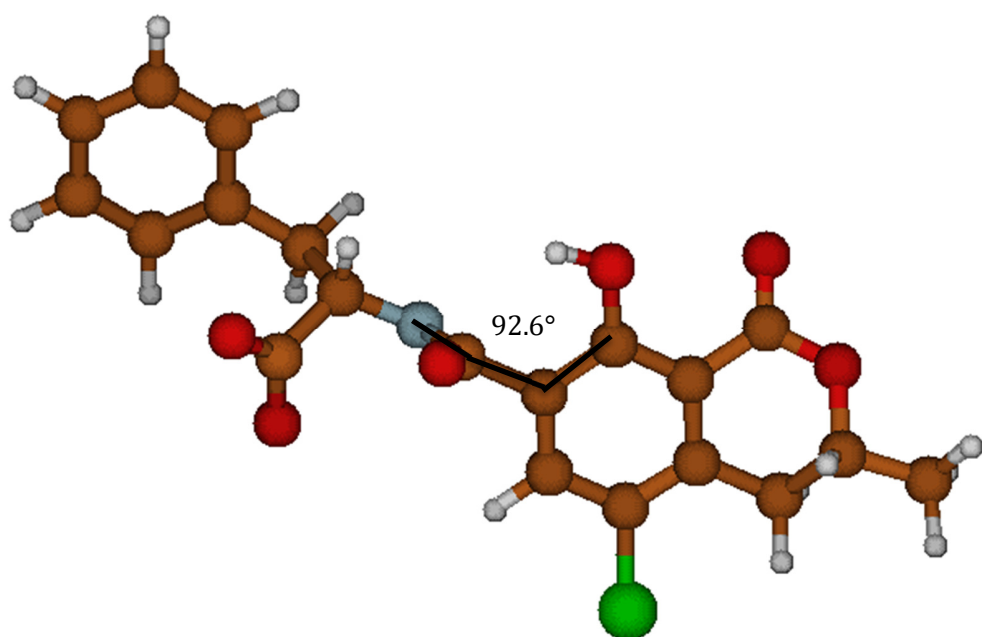

TS 2-3 B



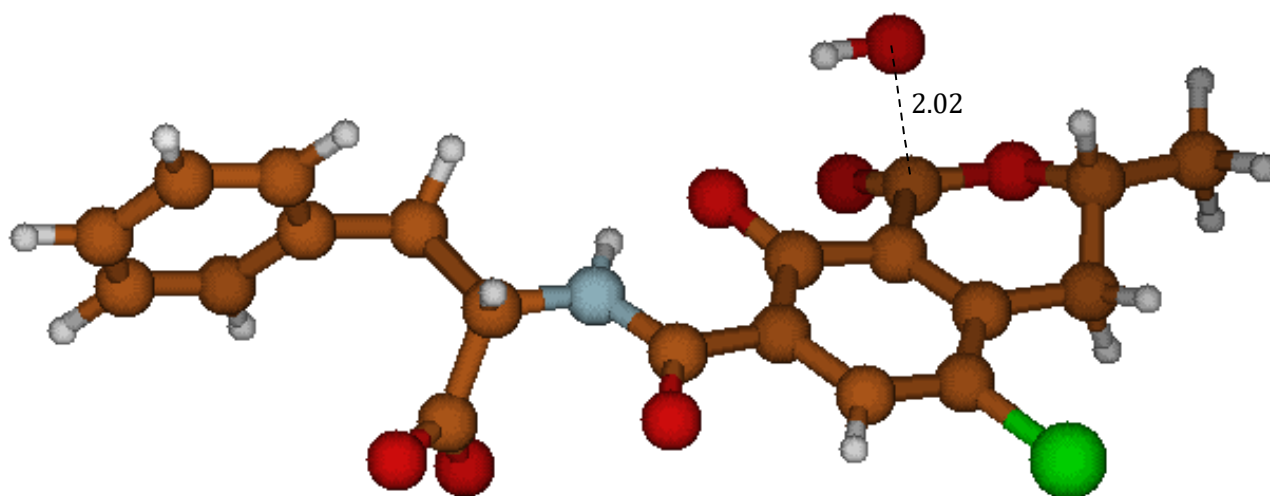

TS 3-TI1

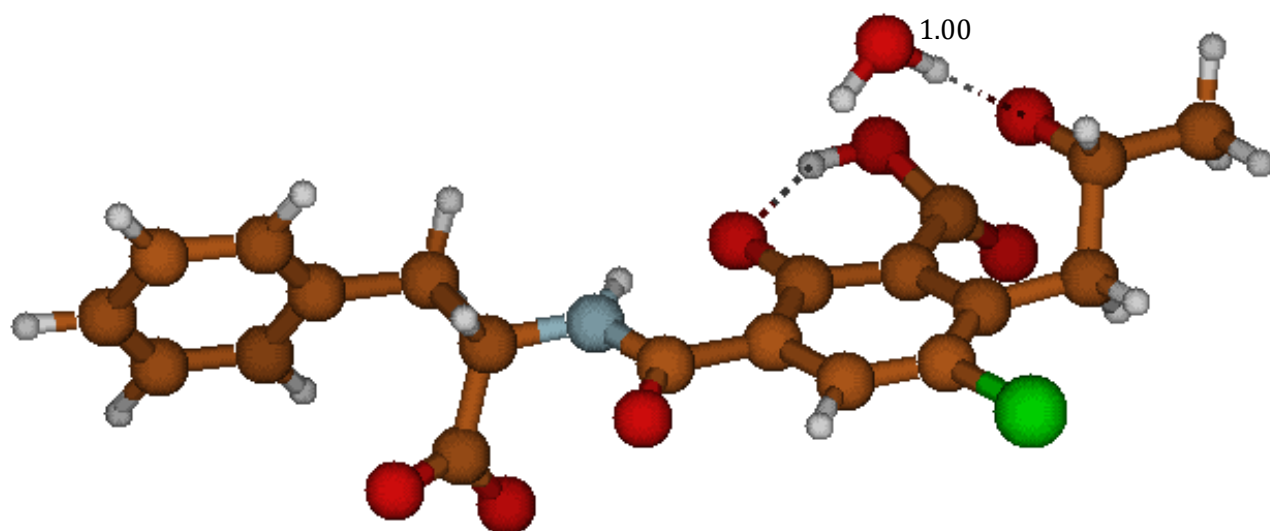

TS TI1-4

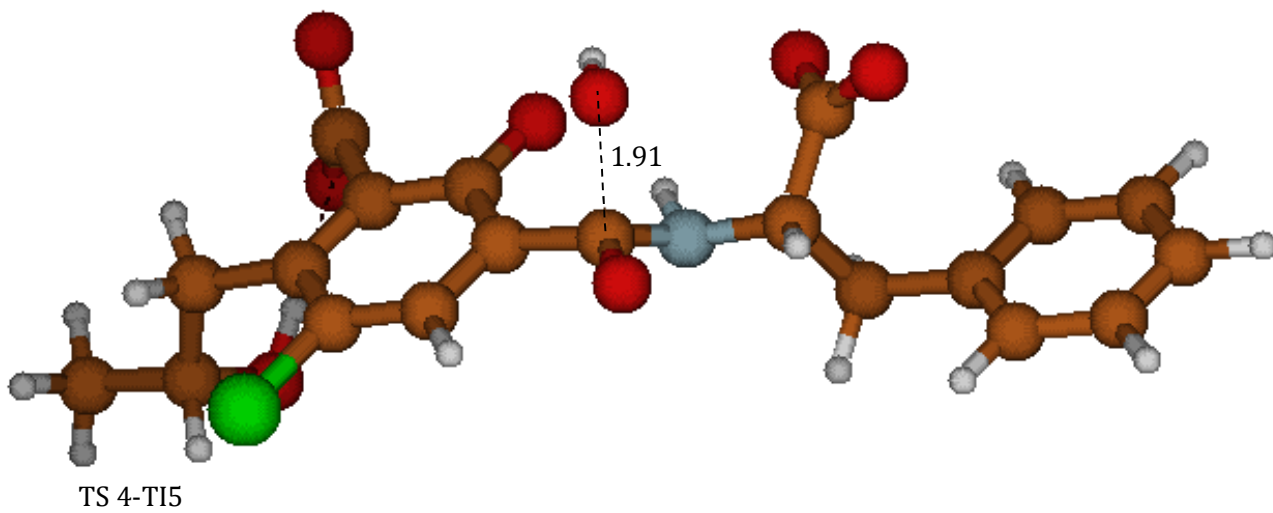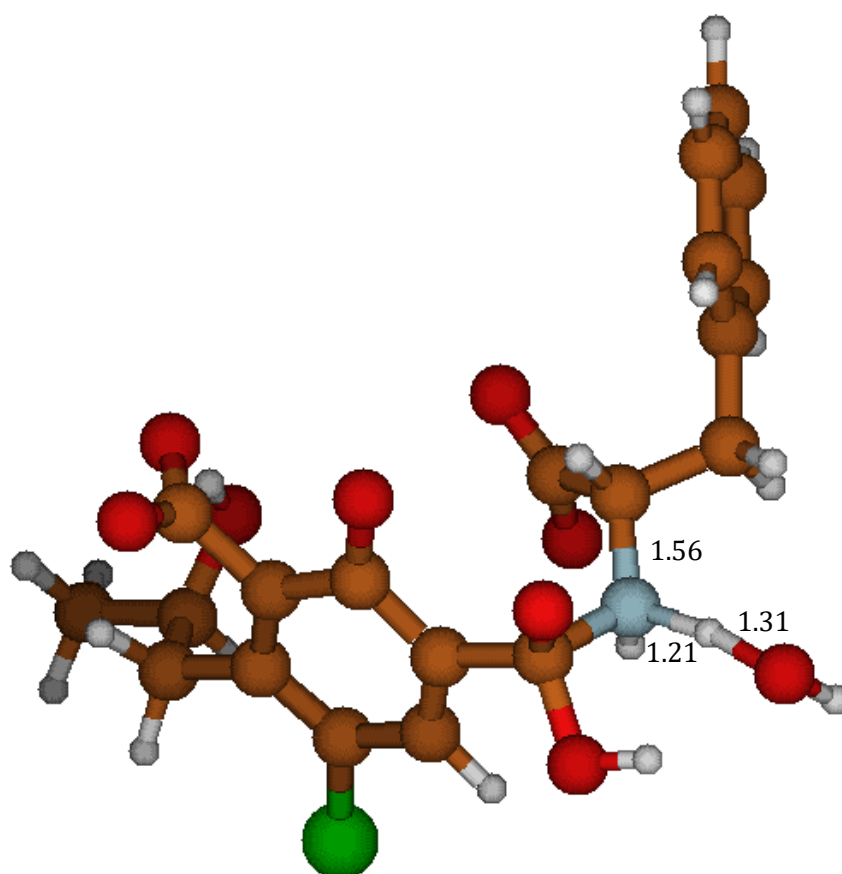

TS TI-5

**Figure S7.** Transition structures with relevant geometric parameters

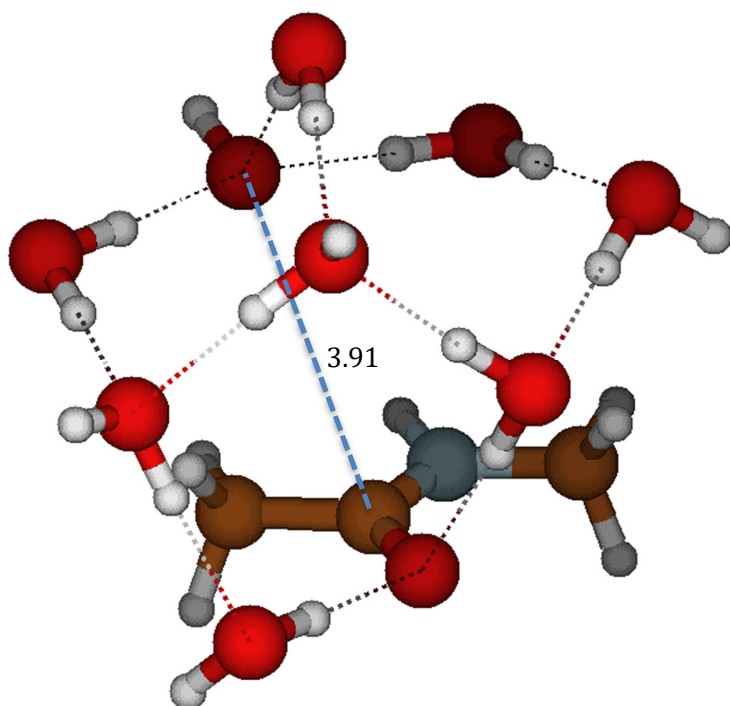

N-Methylacetamide + HO<sup>-</sup>

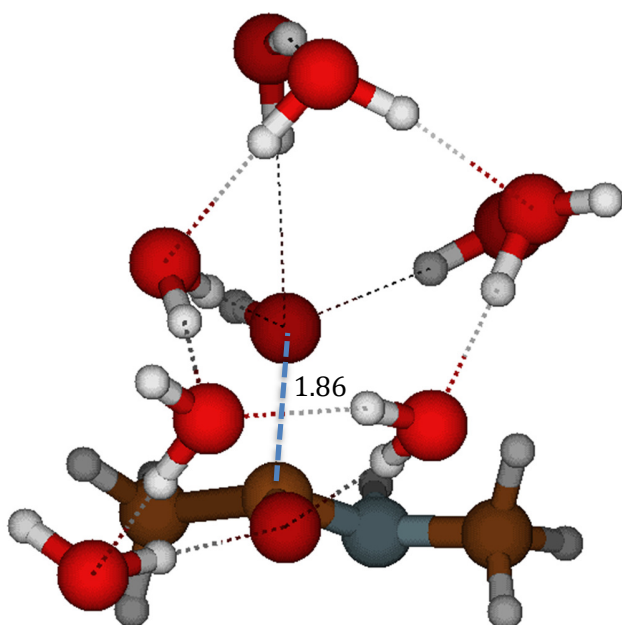

Transition structure of HO<sup>-</sup> addition on N-Methylacetamide.

**Figure S8.** N-Methylacetamide + HO<sup>-</sup> reaction with 8 explicit water molecules.

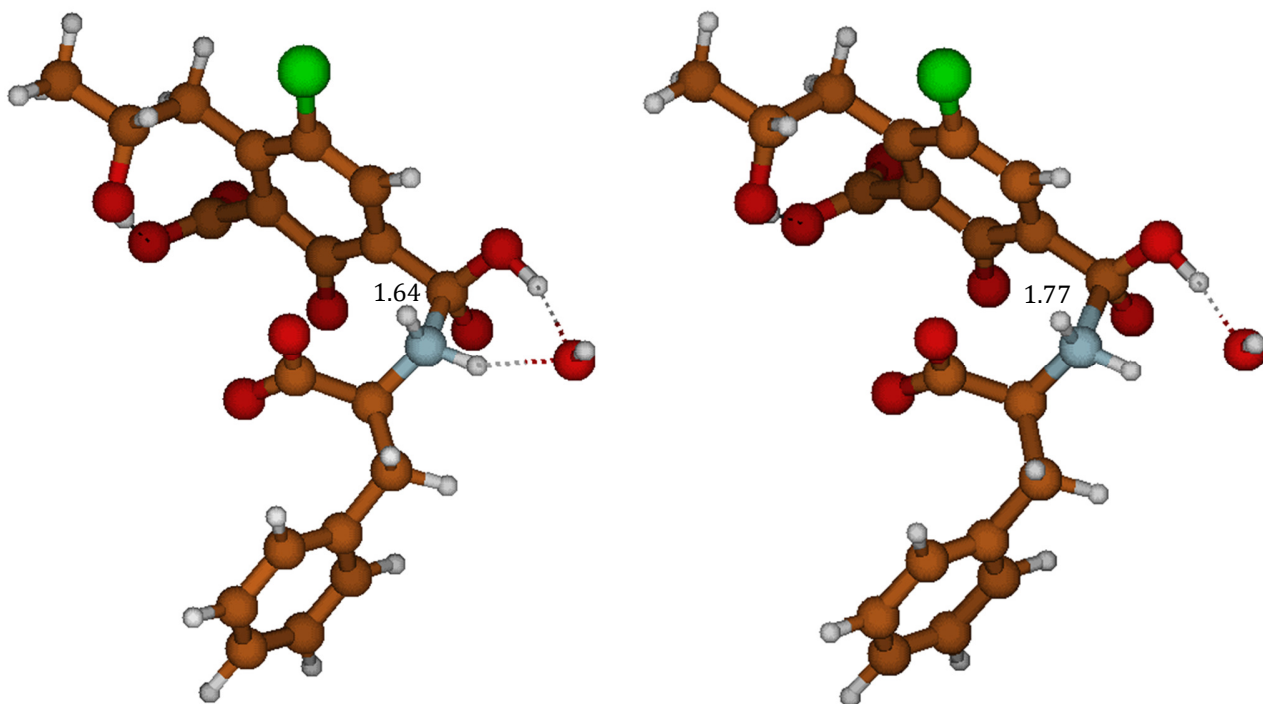

**Figure S9.** Left: intermediate from TS TI2-5. Right: transition structure for C-N dissociation, leading to **5a** + **5b** (see Scheme 1 and note 1).

## Geometries and energetics

### Neutral OTA

| Atom | X         | Y         | Z (Angstrom) |
|------|-----------|-----------|--------------|
| 6    | 5.290327  | 0.127966  | -0.210037    |
| 6    | 3.812819  | 0.378056  | -0.139324    |
| 6    | 2.979740  | -0.702796 | 0.179067     |
| 6    | 3.565392  | -2.031277 | 0.461741     |
| 8    | 4.854771  | -2.228442 | 0.219148     |
| 6    | 5.565915  | -1.300807 | -0.635069    |
| 6    | 1.583488  | -0.538891 | 0.298025     |
| 6    | 1.015546  | 0.721380  | 0.046863     |
| 6    | 1.857591  | 1.780638  | -0.267319    |
| 6    | 3.230406  | 1.619552  | -0.348135    |
| 6    | -0.448869 | 1.048164  | 0.091606     |
| 8    | -0.828877 | 2.191965  | -0.167827    |
| 17   | 4.217502  | 3.014019  | -0.716138    |
| 8    | 0.800308  | -1.563677 | 0.646085     |
| 8    | 2.910722  | -2.945095 | 0.931490     |
| 6    | 7.025538  | -1.686397 | -0.565173    |
| 7    | -1.318971 | 0.072642  | 0.404466     |
| 6    | -2.761894 | 0.273319  | 0.307427     |
| 6    | -3.269950 | 1.046529  | 1.545709     |
| 8    | -2.880838 | 2.317027  | 1.608700     |
| 6    | -3.469372 | -1.071832 | 0.135727     |
| 6    | -4.868243 | -0.916637 | -0.413817    |
| 6    | -5.059668 | -0.760414 | -1.787090    |
| 6    | -6.333537 | -0.591902 | -2.314088    |
| 6    | -7.437665 | -0.580165 | -1.469000    |
| 6    | -7.257066 | -0.736329 | -0.100201    |
| 6    | -5.980582 | -0.901916 | 0.425288     |
| 8    | -3.953990 | 0.548125  | 2.395154     |
| 1    | -5.837586 | -1.001162 | 1.494993     |
| 1    | -8.112781 | -0.725342 | 0.565710     |
| 1    | -8.433573 | -0.449622 | -1.877302    |
| 1    | -6.465191 | -0.472604 | -3.383749    |
| 1    | -4.201265 | -0.775539 | -2.453306    |
| 1    | -2.876123 | -1.673538 | -0.559756    |
| 1    | -0.961283 | -0.839262 | 0.654199     |
| 1    | 1.402205  | 2.747477  | -0.443597    |
| 1    | -2.944031 | 0.896911  | -0.574023    |
| 1    | -3.492191 | -1.589350 | 1.097607     |
| 1    | 5.182073  | -1.455285 | -1.650294    |
| 1    | 5.761266  | 0.809085  | -0.920612    |
| 1    | 5.743034  | 0.322357  | 0.770038     |
| 1    | 7.608214  | -1.053133 | -1.238037    |
| 1    | 7.406172  | -1.560943 | 0.451062     |
| 1    | 7.160187  | -2.727360 | -0.861650    |
| 1    | 1.386734  | -2.328310 | 0.868249     |
| 1    | -2.246854 | 2.512121  | 0.888343     |

SCF Energy -1739.292094 (Hartree)

zpe 0.358831 (Hartree)

Thermal correction to Enthalpy 0.383886 (Hartree)

Thermal correction to Gibbs Free Energy 0.302873 (Hartree)

Enthalpy -1738.908208 (Hartree)

Free Energy -1738.989221 (Hartree)

1

| Atom | X         | Y         | Z (Angstrom) |
|------|-----------|-----------|--------------|
| 6    | -5.559377 | -0.382644 | -1.616957    |
| 6    | -4.953189 | -0.846398 | -0.448054    |
| 6    | -5.756691 | -1.133750 | 0.655136     |
| 6    | -7.136457 | -0.960287 | 0.594121     |
| 6    | -7.730544 | -0.496251 | -0.574632    |
| 6    | -6.936908 | -0.208044 | -1.682041    |
| 6    | -3.455748 | -0.994783 | -0.374465    |
| 6    | -2.733988 | 0.344037  | -0.146843    |
| 6    | -3.199318 | 0.990102  | 1.181320     |
| 8    | -2.694592 | 0.560342  | 2.247158     |
| 7    | -1.305401 | 0.091428  | -0.167366    |
| 6    | -0.416700 | 1.090914  | -0.120198    |
| 8    | -0.774232 | 2.276087  | -0.120985    |
| 6    | 1.047574  | 0.749432  | -0.090517    |
| 6    | 1.925675  | 1.821672  | -0.190528    |
| 6    | 3.297075  | 1.644642  | -0.157127    |
| 6    | 3.857330  | 0.381760  | -0.040296    |
| 6    | 2.987732  | -0.712957 | 0.067891     |
| 6    | 1.587405  | -0.539992 | 0.059889     |
| 6    | 3.544823  | -2.063780 | 0.264774     |
| 8    | 4.845894  | -2.256572 | 0.127088     |
| 6    | 5.657156  | -1.242894 | -0.544301    |
| 6    | 5.332742  | 0.126771  | 0.008047     |
| 8    | 2.851581  | -3.025493 | 0.581830     |
| 6    | 7.096214  | -1.648565 | -0.350744    |
| 17   | 4.320877  | 3.064462  | -0.250352    |
| 8    | 0.763348  | -1.587040 | 0.198108     |
| 8    | -4.087951 | 1.874277  | 1.093784     |
| 1    | -5.296070 | -1.492749 | 1.570375     |
| 1    | -7.746768 | -1.188921 | 1.461167     |
| 1    | -8.805206 | -0.359778 | -0.624636    |
| 1    | -7.392555 | 0.152585  | -2.597875    |
| 1    | -4.944463 | -0.155705 | -2.482761    |
| 1    | -3.080387 | -1.421481 | -1.309003    |
| 1    | -0.972626 | -0.859159 | -0.082288    |
| 1    | 1.510546  | 2.816407  | -0.292082    |
| 1    | -2.983434 | 1.031453  | -0.957778    |
| 1    | -3.186324 | -1.680374 | 0.434777     |
| 1    | 5.381842  | -1.292500 | -1.601340    |
| 1    | 5.874031  | 0.867877  | -0.581013    |
| 1    | 5.681497  | 0.211054  | 1.044090     |
| 1    | 7.740611  | -0.942895 | -0.879333    |
| 1    | 7.360359  | -1.638357 | 0.709552     |
| 1    | 7.272302  | -2.646496 | -0.756304    |
| 1    | 1.308331  | -2.383535 | 0.389281     |

SCF Energy -1738.865285 (Hartree)

zpe 0.343585 (Hartree)

Thermal correction to Enthalpy 0.368844 (Hartree)

Thermal correction to Gibbs Free Energy 0.287167 (Hartree)

Enthalpy -1738.496441 (Hartree)

Free Energy -1738.578118 (Hartree)

**TS 1-3**

| Atom | X         | Y         | Z (Angstrom) |
|------|-----------|-----------|--------------|
| 6    | 5.308385  | 0.354740  | 0.080233     |
| 6    | 3.828744  | 0.577403  | 0.002132     |
| 6    | 2.980778  | -0.538245 | 0.084879     |
| 6    | 3.575001  | -1.863806 | 0.353976     |
| 8    | 4.883789  | -2.027594 | 0.196495     |
| 6    | 5.662051  | -1.001304 | -0.486638    |
| 6    | 1.578821  | -0.397527 | 0.003267     |
| 6    | 1.023077  | 0.885735  | -0.170934    |
| 6    | 1.879337  | 1.977725  | -0.227292    |
| 6    | 3.250287  | 1.829493  | -0.135189    |
| 6    | -0.443493 | 1.205548  | -0.291985    |
| 8    | -0.800404 | 2.368073  | -0.529757    |
| 17   | 4.247925  | 3.270669  | -0.188960    |
| 8    | 0.741202  | -1.437423 | 0.064624     |
| 8    | 2.924482  | -2.815856 | 0.754067     |
| 6    | 7.113119  | -1.373368 | -0.313320    |
| 7    | -1.335535 | 0.221807  | -0.135575    |
| 6    | -2.763280 | 0.471723  | -0.198725    |
| 6    | -3.245896 | 1.435219  | 0.913602     |
| 8    | -4.146032 | 2.250953  | 0.591729     |
| 6    | -3.484944 | -0.882095 | -0.088619    |
| 6    | -4.981124 | -0.764971 | -0.221349    |
| 6    | -5.568377 | -0.604653 | -1.477885    |
| 6    | -6.945328 | -0.463283 | -1.605948    |
| 6    | -7.757450 | -0.481249 | -0.474820    |
| 6    | -7.182544 | -0.642792 | 0.781320     |
| 6    | -5.803256 | -0.783012 | 0.905004     |
| 8    | -2.744003 | 1.309978  | 2.056932     |
| 8    | 0.436375  | -4.346642 | -0.087748    |
| 1    | -5.357181 | -0.904811 | 1.887351     |
| 1    | -7.807675 | -0.659672 | 1.667518     |
| 1    | -8.831919 | -0.372204 | -0.573365    |
| 1    | -7.386110 | -0.341136 | -2.589465    |
| 1    | -4.938473 | -0.590747 | -2.362292    |
| 1    | -3.095318 | -1.532936 | -0.876796    |
| 1    | -1.001691 | -0.708056 | 0.078049     |
| 1    | 1.447178  | 2.962606  | -0.348359    |
| 1    | -3.002465 | 0.931327  | -1.160639    |
| 1    | -3.229360 | -1.337416 | 0.872893     |
| 1    | 5.374741  | -1.049862 | -1.540848    |
| 1    | 5.844282  | 1.117253  | -0.485744    |
| 1    | 5.638025  | 0.424791  | 1.123530     |
| 1    | 7.734357  | -0.651306 | -0.847730    |
| 1    | 7.390596  | -1.359871 | 0.743638     |
| 1    | 7.307167  | -2.366377 | -0.722986    |
| 1    | 1.178828  | -2.303587 | 0.206400     |
| 1    | 1.362318  | -4.471625 | 0.129197     |

SCF Energy -1814.814233 (Hartree)

zpe 0.353031 (Hartree)

Thermal correction to Enthalpy 0.381127 (Hartree)

Thermal correction to Gibbs Free Energy 0.291922 (Hartree)

Enthalpy -1814.433106 (Hartree)

Free Energy -1814.522311 (Hartree)

**TS 1-2**

| Atom | X         | Y         | Z (Angstrom) |
|------|-----------|-----------|--------------|
| 6    | -5.693631 | -1.069018 | -0.841253    |
| 6    | -4.921651 | 0.087789  | -0.950385    |
| 6    | -5.563984 | 1.326787  | -0.898850    |
| 6    | -6.942348 | 1.408399  | -0.737381    |
| 6    | -7.702682 | 0.246896  | -0.625845    |
| 6    | -7.074271 | -0.992605 | -0.680820    |
| 6    | -3.422831 | 0.008584  | -1.079735    |
| 6    | -2.687851 | 0.281833  | 0.246123     |
| 6    | -3.130236 | -0.751418 | 1.309705     |
| 8    | -2.603454 | -1.892355 | 1.280544     |
| 7    | -1.256999 | 0.272661  | -0.005892    |
| 6    | -0.446686 | 0.597082  | 0.980235     |
| 8    | -0.790379 | 0.945908  | 2.135533     |
| 6    | 1.025092  | 0.572516  | 0.646305     |
| 6    | 1.725330  | -0.633494 | 0.539359     |
| 6    | 3.097338  | -0.612208 | 0.225885     |
| 6    | 3.782388  | 0.604489  | 0.056079     |
| 6    | 3.066796  | 1.778412  | 0.208022     |
| 6    | 1.704943  | 1.765639  | 0.492298     |
| 6    | 3.835606  | -1.881940 | 0.130462     |
| 8    | 5.076866  | -1.878464 | -0.333599    |
| 6    | 5.581038  | -0.699198 | -1.034134    |
| 6    | 5.250424  | 0.548795  | -0.245755    |
| 8    | 3.358954  | -2.954876 | 0.485973     |
| 6    | 7.059366  | -0.920925 | -1.230213    |
| 8    | 1.050609  | -1.776321 | 0.749466     |
| 17   | 3.863224  | 3.334076  | 0.051374     |
| 8    | -4.028909 | -0.389435 | 2.114250     |
| 8    | -0.305878 | -0.526876 | -2.170802    |
| 1    | -5.205938 | -2.038363 | -0.878585    |
| 1    | -7.657654 | -1.903262 | -0.597417    |
| 1    | -8.777828 | 0.309643  | -0.498519    |
| 1    | -7.425022 | 2.378989  | -0.698324    |
| 1    | -4.976110 | 2.235902  | -0.984159    |
| 1    | -3.075745 | 0.745460  | -1.809598    |
| 1    | -0.794639 | -0.126126 | -1.060077    |
| 1    | 1.167368  | 2.701591  | 0.593167     |
| 1    | -2.990219 | 1.267230  | 0.615349     |
| 1    | -3.131526 | -0.979484 | -1.446786    |
| 1    | 5.063045  | -0.677653 | -1.996914    |
| 1    | 5.561288  | 1.414549  | -0.831670    |
| 1    | 5.819355  | 0.563166  | 0.691251     |
| 1    | 7.477382  | -0.082834 | -1.791863    |
| 1    | 7.570016  | -0.985628 | -0.266177    |
| 1    | 7.239485  | -1.838786 | -1.792921    |
| 1    | 0.250408  | -1.278567 | -1.952663    |
| 1    | 1.695149  | -2.512884 | 0.722263     |

SCF Energy -1814.820150 (Hartree)

zpe 0.349827 (Hartree)

Thermal correction to Enthalpy

0.377547 (Hartree)

Thermal correction to Gibbs Free Energy

0.289449 (Hartree)

Enthalpy -1814.442603 (Hartree)

Free Energy -1814.530701 (Hartree)



2

| Atom                                    | X         | Y            | Z (Angstrom)       |
|-----------------------------------------|-----------|--------------|--------------------|
| 6                                       | 5.736322  | 0.357625     | -1.433359          |
| 6                                       | 5.143821  | 0.775067     | -0.238912          |
| 6                                       | 5.930741  | 0.818477     | 0.913013           |
| 6                                       | 7.274387  | 0.456763     | 0.875565           |
| 6                                       | 7.852575  | 0.042619     | -0.319838          |
| 6                                       | 7.077907  | -0.005272    | -1.476138          |
| 6                                       | 3.679320  | 1.126856     | -0.191678          |
| 6                                       | 2.746937  | -0.099361    | -0.143182          |
| 6                                       | 3.115422  | -0.965227    | 1.086563           |
| 8                                       | 2.729668  | -0.580746    | 2.222376           |
| 7                                       | 1.371030  | 0.370670     | -0.150224          |
| 6                                       | 0.468023  | -0.552773    | -0.237058          |
| 8                                       | 0.679448  | -1.830772    | -0.320083          |
| 6                                       | -0.978279 | -0.123474    | -0.243203          |
| 6                                       | -1.321784 | 1.218238     | -0.212645          |
| 6                                       | -2.647980 | 1.618306     | -0.182063          |
| 6                                       | -3.682736 | 0.696264     | -0.171363          |
| 6                                       | -3.357552 | -0.669570    | -0.252182          |
| 6                                       | -2.010288 | -1.088889    | -0.278826          |
| 6                                       | -4.459634 | -1.648030    | -0.395749          |
| 8                                       | -5.687284 | -1.273722    | -0.009840          |
| 6                                       | -5.874844 | -0.009870    | 0.683923           |
| 6                                       | -5.129994 | 1.074184     | -0.063159          |
| 8                                       | -4.345547 | -2.755776    | -0.884992          |
| 6                                       | -7.363303 | 0.220511     | 0.772898           |
| 17                                      | -2.991984 | 3.342479     | -0.152442          |
| 8                                       | -1.702882 | -2.386869    | -0.313473          |
| 8                                       | 3.825201  | -1.987045    | 0.881877           |
| 1                                       | 5.483656  | 1.139163     | 1.849125           |
| 1                                       | 7.869026  | 0.498894     | 1.781904           |
| 1                                       | 8.899716  | -0.237730    | -0.352406          |
| 1                                       | 7.521187  | -0.325129    | -2.413159          |
| 1                                       | 5.138449  | 0.318729     | -2.339218          |
| 1                                       | 3.411385  | 1.707101     | -1.079497          |
| 1                                       | -0.530205 | 1.956172     | -0.200760          |
| 1                                       | 2.950782  | -0.716639    | -1.026907          |
| 1                                       | 3.474545  | 1.751466     | 0.682990           |
| 1                                       | -5.445775 | -0.132041    | 1.683083           |
| 1                                       | -5.245546 | 2.014714     | 0.475904           |
| 1                                       | -5.566799 | 1.208350     | -1.059851          |
| 1                                       | -7.551803 | 1.143235     | 1.326241           |
| 1                                       | -7.800477 | 0.316710     | -0.224285          |
| 1                                       | -7.850519 | -0.603041    | 1.298622           |
| 1                                       | -0.674326 | -2.392018    | -0.321246          |
| SCF Energy                              |           | -1738.372715 | (Hartree)          |
| zpe                                     |           | 0.328506     | (Hartree)          |
| Thermal correction to Enthalpy          |           |              | 0.353502 (Hartree) |
| Thermal correction to Gibbs Free Energy |           |              | 0.272200 (Hartree) |
| Enthalpy                                |           | -1738.019213 | (Hartree)          |
| Free Energy                             |           | -1738.100515 | (Hartree)          |

**TS 2-3 A**

| Atom | X         | Y         | Z (Angstrom) |
|------|-----------|-----------|--------------|
| 6    | -5.643322 | -0.623209 | -1.415357    |
| 6    | -5.021774 | 0.492385  | -0.853004    |

|                                         |              |           |                    |
|-----------------------------------------|--------------|-----------|--------------------|
| 6                                       | -5.797879    | 1.375934  | -0.098531          |
| 6                                       | -7.156034    | 1.148848  | 0.091987           |
| 6                                       | -7.764378    | 0.030316  | -0.472523          |
| 6                                       | -7.003310    | -0.854603 | -1.228767          |
| 6                                       | -3.542009    | 0.720360  | -1.021294          |
| 6                                       | -2.701670    | 0.362607  | 0.220480           |
| 6                                       | -2.966954    | -1.110690 | 0.614554           |
| 8                                       | -2.337230    | -2.017063 | 0.005881           |
| 7                                       | -1.303749    | 0.636706  | -0.075335          |
| 6                                       | -0.487550    | 0.373012  | 0.902437           |
| 8                                       | -0.765551    | -0.036302 | 2.082036           |
| 6                                       | 0.984106     | 0.480385  | 0.583710           |
| 6                                       | 1.721965     | -0.703045 | 0.435972           |
| 6                                       | 3.100960     | -0.642332 | 0.177296           |
| 6                                       | 3.743069     | 0.604859  | 0.039259           |
| 6                                       | 2.990123     | 1.753894  | 0.208333           |
| 6                                       | 1.627030     | 1.698048  | 0.474856           |
| 6                                       | 3.927869     | -1.873278 | 0.125965           |
| 8                                       | 5.136359     | -1.797327 | -0.442897          |
| 6                                       | 5.541442     | -0.589083 | -1.144626          |
| 6                                       | 5.206846     | 0.613190  | -0.290788          |
| 8                                       | 3.605463     | -2.941102 | 0.609007           |
| 6                                       | 7.013740     | -0.737292 | -1.440068          |
| 8                                       | 1.109561     | -1.907287 | 0.507355           |
| 17                                      | 3.741425     | 3.337859  | 0.093292           |
| 8                                       | -3.838273    | -1.323334 | 1.501267           |
| 1                                       | -5.052974    | -1.319505 | -2.003332          |
| 1                                       | -7.467565    | -1.728054 | -1.674083          |
| 1                                       | -8.823827    | -0.147598 | -0.324054          |
| 1                                       | -7.742568    | 1.845532  | 0.681432           |
| 1                                       | -5.330267    | 2.250351  | 0.344367           |
| 1                                       | -3.358294    | 1.774756  | -1.247678          |
| 1                                       | 1.061142     | 2.614714  | 0.593374           |
| 1                                       | -3.055628    | 0.973190  | 1.060170           |
| 1                                       | -3.172938    | 0.135221  | -1.869010          |
| 1                                       | 4.964455     | -0.557251 | -2.073695          |
| 1                                       | 5.475257     | 1.515502  | -0.840806          |
| 1                                       | 5.804054     | 0.596145  | 0.628553           |
| 1                                       | 7.357813     | 0.132503  | -2.003994          |
| 1                                       | 7.587633     | -0.802455 | -0.512130          |
| 1                                       | 7.198733     | -1.631907 | -2.037777          |
| 1                                       | 0.160755     | -1.794188 | 0.659516           |
| SCF Energy                              | -1738.361916 | (Hartree) |                    |
| zpe                                     | 0.328967     | (Hartree) |                    |
| Thermal correction to Enthalpy          |              |           | 0.353645 (Hartree) |
| Thermal correction to Gibbs Free Energy |              |           | 0.274055 (Hartree) |
| Enthalpy                                | -1738.008271 | (Hartree) |                    |
| Free Energy                             | -1738.087861 | (Hartree) |                    |

### TS 2-3 B

| Atom | X        | Y         | Z (Angstrom) |
|------|----------|-----------|--------------|
| 6    | 5.943776 | 0.497260  | -1.065929    |
| 6    | 5.005809 | -0.505016 | -0.815313    |
| 6    | 5.451986 | -1.711875 | -0.270858    |
| 6    | 6.797451 | -1.912627 | 0.015461     |
| 6    | 7.723927 | -0.904850 | -0.240197    |
| 6    | 7.292573 | 0.301071  | -0.782886    |

|                                         |              |           |                    |
|-----------------------------------------|--------------|-----------|--------------------|
| 6                                       | 3.540752     | -0.290032 | -1.091927          |
| 6                                       | 2.706367     | 0.047862  | 0.159038           |
| 6                                       | 3.232714     | 1.359365  | 0.784078           |
| 8                                       | 2.846449     | 2.453496  | 0.293741           |
| 7                                       | 1.303706     | 0.094639  | -0.225807          |
| 6                                       | 0.463447     | 0.219626  | 0.759501           |
| 8                                       | 0.702607     | 0.301879  | 2.012686           |
| 6                                       | -0.996995    | 0.272471  | 0.362495           |
| 6                                       | -1.773054    | -0.891180 | 0.318385           |
| 6                                       | -3.137737    | -0.813518 | -0.007120          |
| 6                                       | -3.739372    | 0.435425  | -0.255477          |
| 6                                       | -2.939660    | 1.565642  | -0.229231          |
| 6                                       | -1.586599    | 1.489758  | 0.073729           |
| 6                                       | -3.958050    | -2.038209 | -0.179823          |
| 8                                       | -5.289027    | -1.915235 | -0.133667          |
| 6                                       | -5.893494    | -0.645612 | 0.239087           |
| 6                                       | -5.214567    | 0.467848  | -0.526828          |
| 8                                       | -3.506312    | -3.143474 | -0.407447          |
| 6                                       | -7.369944    | -0.770897 | -0.044295          |
| 8                                       | -1.225742    | -2.097122 | 0.601061           |
| 17                                      | -3.618766    | 3.146204  | -0.583637          |
| 8                                       | 4.060800     | 1.257614  | 1.730615           |
| 1                                       | 5.611824     | 1.441538  | -1.487150          |
| 1                                       | 8.007352     | 1.091157  | -0.986956          |
| 1                                       | 8.774735     | -1.061125 | -0.022178          |
| 1                                       | 7.125422     | -2.857335 | 0.435904           |
| 1                                       | 4.733699     | -2.501827 | -0.071826          |
| 1                                       | 3.116002     | -1.199599 | -1.526321          |
| 1                                       | -0.983690    | 2.390685  | 0.094424           |
| 1                                       | 2.879482     | -0.738893 | 0.903756           |
| 1                                       | 3.412881     | 0.512101  | -1.825477          |
| 1                                       | -5.718969    | -0.516474 | 1.311415           |
| 1                                       | -5.646257    | 1.418299  | -0.211995          |
| 1                                       | -5.407924    | 0.354785  | -1.599883          |
| 1                                       | -7.874950    | 0.146188  | 0.266998           |
| 1                                       | -7.547145    | -0.923706 | -1.111909          |
| 1                                       | -7.799488    | -1.606414 | 0.511834           |
| 1                                       | -0.296067    | -1.989642 | 0.834593           |
| SCF Energy                              | -1738.361063 | (Hartree) |                    |
| zpe                                     | 0.329385     | (Hartree) |                    |
| Thermal correction to Enthalpy          |              |           | 0.354098 (Hartree) |
| Thermal correction to Gibbs Free Energy |              |           | 0.273689 (Hartree) |
| Enthalpy                                | -1738.006965 | (Hartree) |                    |
| Free Energy                             | -1738.087374 | (Hartree) |                    |

### 3

| Atom | X         | Y         | Z (Angstrom) |
|------|-----------|-----------|--------------|
| 6    | -5.524361 | -0.447113 | -1.625030    |
| 6    | -4.912154 | -0.869746 | -0.443590    |
| 6    | -5.713247 | -1.139771 | 0.665997     |
| 6    | -7.095405 | -0.988623 | 0.599207     |
| 6    | -7.694979 | -0.564611 | -0.581970    |
| 6    | -6.904274 | -0.294774 | -1.696089    |
| 6    | -3.412647 | -0.990827 | -0.364223    |
| 6    | -2.713131 | 0.364171  | -0.163365    |
| 6    | -3.198095 | 1.028373  | 1.148388     |
| 8    | -2.707247 | 0.617085  | 2.228538     |

|                                         |           |              |                    |
|-----------------------------------------|-----------|--------------|--------------------|
| 7                                       | -1.284072 | 0.136155     | -0.176434          |
| 6                                       | -0.400403 | 1.140946     | -0.131235          |
| 8                                       | -0.768025 | 2.331332     | -0.145134          |
| 6                                       | 1.045233  | 0.773655     | -0.078421          |
| 6                                       | 1.941658  | 1.825042     | -0.149903          |
| 6                                       | 3.310583  | 1.617343     | -0.123523          |
| 6                                       | 3.837190  | 0.340122     | -0.008845          |
| 6                                       | 2.953789  | -0.747036    | 0.119558           |
| 6                                       | 1.518294  | -0.586370    | 0.050982           |
| 6                                       | 3.530051  | -2.068334    | 0.419700           |
| 8                                       | 4.830943  | -2.282141    | 0.136119           |
| 6                                       | 5.572827  | -1.292664    | -0.617666          |
| 6                                       | 5.313264  | 0.070426     | -0.019509          |
| 8                                       | 2.943905  | -2.993462    | 0.957914           |
| 6                                       | 7.023127  | -1.710051    | -0.579717          |
| 17                                      | 4.367894  | 3.023547     | -0.227543          |
| 8                                       | 0.718550  | -1.577261    | 0.083301           |
| 8                                       | -4.089199 | 1.909253     | 1.039331           |
| 1                                       | -5.248433 | -1.466688    | 1.591124           |
| 1                                       | -7.703225 | -1.202822    | 1.471687           |
| 1                                       | -8.771456 | -0.445092    | -0.636404          |
| 1                                       | -7.364167 | 0.033778     | -2.621859          |
| 1                                       | -4.911803 | -0.234556    | -2.496147          |
| 1                                       | -3.027651 | -1.430429    | -1.288745          |
| 1                                       | -0.888854 | -0.801314    | -0.087827          |
| 1                                       | 1.551785  | 2.831971     | -0.241597          |
| 1                                       | -2.978477 | 1.030642     | -0.987682          |
| 1                                       | -3.132595 | -1.654569    | 0.459426           |
| 1                                       | 5.193934  | -1.322794    | -1.644377          |
| 1                                       | 5.838259  | 0.821175     | -0.611179          |
| 1                                       | 5.715279  | 0.114452     | 0.999789           |
| 1                                       | 7.616586  | -1.013815    | -1.176696          |
| 1                                       | 7.401604  | -1.701328    | 0.445756           |
| 1                                       | 7.148176  | -2.711393    | -0.997040          |
| SCF Energy                              |           | -1738.398554 | (Hartree)          |
| zpe                                     |           | 0.329872     | (Hartree)          |
| Thermal correction to Enthalpy          |           |              | 0.355133 (Hartree) |
| Thermal correction to Gibbs Free Energy |           |              | 0.272432 (Hartree) |
| Enthalpy                                |           | -1738.043421 | (Hartree)          |
| Free Energy                             |           | -1738.126122 | (Hartree)          |

**TS 3-8**

| Atom | X         | Y         | Z (Angstrom) |
|------|-----------|-----------|--------------|
| 6    | -5.306531 | 0.084971  | -0.390931    |
| 6    | -3.842511 | 0.318542  | -0.154443    |
| 6    | -2.983621 | -0.806221 | -0.073663    |
| 6    | -3.545133 | -2.122768 | -0.392032    |
| 8    | -4.886713 | -2.283577 | -0.340582    |
| 6    | -5.711092 | -1.235114 | 0.223406     |
| 6    | -1.580719 | -0.675108 | 0.226683     |
| 6    | -1.081857 | 0.675622  | 0.357261     |
| 6    | -1.929534 | 1.746003  | 0.228997     |
| 6    | -3.295513 | 1.572971  | -0.013703    |
| 6    | 0.387189  | 0.975866  | 0.619575     |
| 8    | 0.743986  | 2.169988  | 0.844682     |
| 17   | -4.296016 | 3.021134  | -0.154771    |
| 8    | -0.808815 | -1.678154 | 0.401291     |

|                                         |           |              |           |           |
|-----------------------------------------|-----------|--------------|-----------|-----------|
| 8                                       | -2.911992 | -3.104340    | -0.754610 |           |
| 6                                       | -7.147676 | -1.618345    | -0.039382 |           |
| 7                                       | 1.238927  | 0.164978     | -0.147336 |           |
| 6                                       | 2.668160  | 0.303001     | 0.067359  |           |
| 6                                       | 3.276949  | 1.512626     | -0.673389 |           |
| 8                                       | 4.103156  | 2.215136     | -0.029833 |           |
| 6                                       | 3.355680  | -0.989336    | -0.409288 |           |
| 6                                       | 4.849239  | -0.973641    | -0.212851 |           |
| 6                                       | 5.399173  | -1.194076    | 1.051975  |           |
| 6                                       | 6.774450  | -1.145654    | 1.248812  |           |
| 6                                       | 7.624374  | -0.874979    | 0.179237  |           |
| 6                                       | 7.087911  | -0.654736    | -1.084890 |           |
| 6                                       | 5.709978  | -0.703732    | -1.277027 |           |
| 8                                       | 2.967308  | 1.696834     | -1.879007 |           |
| 1                                       | 5.295392  | -0.528879    | -2.265113 |           |
| 1                                       | 7.741943  | -0.444346    | -1.924282 |           |
| 1                                       | 8.697544  | -0.838144    | 0.331166  |           |
| 1                                       | 7.184571  | -1.321137    | 2.237561  |           |
| 1                                       | 4.740141  | -1.405359    | 1.888796  |           |
| 1                                       | 2.920664  | -1.822270    | 0.152487  |           |
| 1                                       | 0.918792  | -0.797984    | -0.119484 |           |
| 1                                       | -1.524601 | 2.746594     | 0.328893  |           |
| 1                                       | 2.885712  | 0.435965     | 1.132919  |           |
| 1                                       | 3.120591  | -1.145123    | -1.466244 |           |
| 1                                       | -5.513045 | -1.216031    | 1.300242  |           |
| 1                                       | -5.903477 | 0.880804     | 0.056089  |           |
| 1                                       | -5.524482 | 0.073240     | -1.465839 |           |
| 1                                       | -7.809127 | -0.873687    | 0.409367  |           |
| 1                                       | -7.345712 | -1.658877    | -1.113794 |           |
| 1                                       | -7.374752 | -2.591266    | 0.401598  |           |
| 8                                       | 0.469511  | 0.176521     | 2.349709  |           |
| 1                                       | 0.184601  | -0.722241    | 2.154661  |           |
| SCF Energy                              |           | -1814.318623 | (Hartree) |           |
| zpe                                     |           | 0.341565     | (Hartree) |           |
| Thermal correction to Enthalpy          |           |              | 0.368215  | (Hartree) |
| Thermal correction to Gibbs Free Energy |           |              | 0.283503  | (Hartree) |
| Enthalpy                                |           | -1813.950408 | (Hartree) |           |
| Free Energy                             |           | -1814.035120 | (Hartree) |           |

### TS 3-6

| Atom | X         | Y         | Z (Angstrom) |
|------|-----------|-----------|--------------|
| 6    | 5.750985  | -0.213273 | 1.383897     |
| 6    | 4.986007  | 0.631086  | 0.579055     |
| 6    | 5.628124  | 1.352367  | -0.430576    |
| 6    | 6.997394  | 1.229064  | -0.634284    |
| 6    | 7.750767  | 0.381162  | 0.174065     |
| 6    | 7.123269  | -0.338269 | 1.185382     |
| 6    | 3.493614  | 0.733825  | 0.758791     |
| 6    | 2.703777  | -0.047255 | -0.309803    |
| 6    | 3.107613  | -1.540383 | -0.257875    |
| 8    | 2.617704  | -2.252350 | 0.655748     |
| 7    | 1.284779  | 0.172362  | -0.093445    |
| 6    | 0.435116  | -0.274769 | -0.999012    |
| 8    | 0.749908  | -0.896487 | -2.048958    |
| 6    | -1.014536 | 0.013314  | -0.723753    |
| 6    | -1.893123 | -1.089570 | -0.421052    |
| 6    | -3.275572 | -0.741186 | -0.201661    |

|                                         |              |           |                    |
|-----------------------------------------|--------------|-----------|--------------------|
| 6                                       | -3.719678    | 0.605162  | -0.219759          |
| 6                                       | -2.814215    | 1.600649  | -0.511574          |
| 6                                       | -1.469262    | 1.306219  | -0.763277          |
| 6                                       | -4.273933    | -1.798751 | -0.027887          |
| 8                                       | -5.484968    | -1.472371 | 0.476988           |
| 6                                       | -5.692719    | -0.155733 | 1.042234           |
| 6                                       | -5.165501    | 0.881288  | 0.077350           |
| 8                                       | -4.132275    | -2.972200 | -0.341582          |
| 6                                       | -7.170616    | -0.029931 | 1.326314           |
| 8                                       | -1.431271    | -2.271914 | -0.326496          |
| 17                                      | -3.311209    | 3.291967  | -0.586348          |
| 8                                       | 3.941668     | -1.939036 | -1.114188          |
| 8                                       | 0.469907     | 1.320901  | 1.964381           |
| 1                                       | 5.264908     | -0.780910 | 2.171572           |
| 1                                       | 7.702717     | -0.998976 | 1.821250           |
| 1                                       | 8.819133     | 0.282799  | 0.016026           |
| 1                                       | 7.478753     | 1.795550  | -1.424321          |
| 1                                       | 5.044565     | 2.013404  | -1.064506          |
| 1                                       | 3.187114     | 1.782061  | 0.701031           |
| 1                                       | 0.869122     | 0.746242  | 0.930461           |
| 1                                       | -0.777735    | 2.113549  | -0.980055          |
| 1                                       | 2.992669     | 0.327689  | -1.297384          |
| 1                                       | 3.211460     | 0.362015  | 1.747840           |
| 1                                       | -5.121279    | -0.114348 | 1.975381           |
| 1                                       | -5.289638    | 1.869731  | 0.521191           |
| 1                                       | -5.754589    | 0.859213  | -0.847589          |
| 1                                       | -7.369082    | 0.938804  | 1.790472           |
| 1                                       | -7.747832    | -0.099198 | 0.400454           |
| 1                                       | -7.500689    | -0.813661 | 2.011369           |
| 1                                       | -0.482962    | 1.383620  | 1.862239           |
| SCF Energy                              | -1814.344813 | (Hartree) |                    |
| zpe                                     | 0.336193     | (Hartree) |                    |
| Thermal correction to Enthalpy          |              |           | 0.363850 (Hartree) |
| Thermal correction to Gibbs Free Energy |              |           | 0.276617 (Hartree) |
| Enthalpy                                | -1813.980963 | (Hartree) |                    |
| Free Energy                             | -1814.068196 | (Hartree) |                    |

## 6

| Atom | X         | Y         | Z (Angstrom) |
|------|-----------|-----------|--------------|
| 6    | 5.224129  | 0.723011  | -0.232996    |
| 6    | 3.754889  | 0.612549  | 0.058097     |
| 6    | 3.179331  | -0.685287 | 0.128966     |
| 6    | 4.067024  | -1.844161 | 0.029242     |
| 8    | 5.308869  | -1.671914 | -0.482616    |
| 6    | 5.650738  | -0.420155 | -1.124499    |
| 6    | 1.770933  | -0.877998 | 0.366855     |
| 6    | 0.993397  | 0.323401  | 0.555504     |
| 6    | 1.574094  | 1.562205  | 0.511031     |
| 6    | 2.948424  | 1.705863  | 0.264741     |
| 6    | -0.476219 | 0.184057  | 0.864229     |
| 8    | -0.777176 | -0.047402 | 2.088901     |
| 17   | 3.607972  | 3.343813  | 0.241342     |
| 8    | 1.196194  | -2.015938 | 0.394420     |
| 8    | 3.806887  | -2.980172 | 0.402556     |
| 6    | 7.135633  | -0.459105 | -1.398203    |
| 7    | -1.292923 | 0.319268  | -0.144935    |
| 6    | -2.706098 | 0.190268  | 0.173615     |

|                                         |           |              |                    |
|-----------------------------------------|-----------|--------------|--------------------|
| 6                                       | -3.127293 | -1.190404    | 0.728605           |
| 8                                       | -3.973570 | -1.202262    | 1.665657           |
| 6                                       | -3.515973 | 0.478112     | -1.107138          |
| 6                                       | -5.009182 | 0.430091     | -0.913018          |
| 6                                       | -5.684433 | 1.497853     | -0.316308          |
| 6                                       | -7.055547 | 1.439941     | -0.092257          |
| 6                                       | -7.777771 | 0.308653     | -0.463784          |
| 6                                       | -7.117557 | -0.759870    | -1.061346          |
| 6                                       | -5.744792 | -0.696780    | -1.282826          |
| 8                                       | -2.653040 | -2.226090    | 0.190352           |
| 1                                       | -5.234011 | -1.535970    | -1.745468          |
| 1                                       | -7.670756 | -1.645489    | -1.355549          |
| 1                                       | -8.847227 | 0.261502     | -0.289743          |
| 1                                       | -7.562096 | 2.279446     | 0.372011           |
| 1                                       | -5.127299 | 2.383024     | -0.023534          |
| 1                                       | -3.221774 | 1.469407     | -1.464197          |
| 1                                       | 0.965705  | 2.448257     | 0.663920           |
| 1                                       | -3.004081 | 0.925152     | 0.932352           |
| 1                                       | -3.219215 | -0.246298    | -1.871634          |
| 1                                       | 5.092259  | -0.379767    | -2.065649          |
| 1                                       | 5.452303  | 1.663786     | -0.735143          |
| 1                                       | 5.801138  | 0.698529     | 0.699527           |
| 1                                       | 7.433571  | 0.456455     | -1.914474          |
| 1                                       | 7.697522  | -0.530666    | -0.463081          |
| 1                                       | 7.391244  | -1.310308    | -2.032816          |
| SCF Energy                              |           | -1737.889227 | (Hartree)          |
| zpe                                     |           | 0.316015     | (Hartree)          |
| Thermal correction to Enthalpy          |           |              | 0.341270 (Hartree) |
| Thermal correction to Gibbs Free Energy |           |              | 0.258253 (Hartree) |
| Enthalpy                                |           | -1737.547957 | (Hartree)          |
| Free Energy                             |           | -1737.630974 | (Hartree)          |

### TS 6-7

| Atom | X         | Y         | Z (Angstrom) |
|------|-----------|-----------|--------------|
| 6    | -6.185872 | 0.682039  | 0.864649     |
| 6    | -5.217793 | -0.322396 | 0.899215     |
| 6    | -5.614390 | -1.636303 | 0.635926     |
| 6    | -6.939749 | -1.938585 | 0.345901     |
| 6    | -7.896953 | -0.927383 | 0.315862     |
| 6    | -7.515371 | 0.384577  | 0.576563     |
| 6    | -3.770294 | -0.008079 | 1.176716     |
| 6    | -2.884409 | 0.018088  | -0.085010    |
| 6    | -3.419894 | 1.104970  | -1.042779    |
| 8    | -3.138939 | 2.309933  | -0.797818    |
| 7    | -1.498856 | 0.195991  | 0.321686     |
| 6    | -0.627317 | 0.136802  | -0.650025    |
| 8    | -0.870062 | -0.043081 | -1.897338    |
| 6    | 0.821669  | 0.299874  | -0.267334    |
| 6    | 1.653506  | -0.861178 | -0.200297    |
| 6    | 3.030834  | -0.641421 | 0.131642     |
| 6    | 3.555505  | 0.652517  | 0.289482     |
| 6    | 2.687904  | 1.734802  | 0.218567     |
| 6    | 1.333612  | 1.562595  | -0.044449    |
| 6    | 3.927153  | -1.824352 | 0.382546     |
| 8    | 5.271947  | -1.552769 | 0.533807     |
| 6    | 5.787615  | -0.356922 | -0.066342    |
| 6    | 5.035552  | 0.829370  | 0.500988     |

|                                         |           |              |                    |
|-----------------------------------------|-----------|--------------|--------------------|
| 8                                       | 3.543124  | -2.810445    | 1.040807           |
| 6                                       | 7.272398  | -0.317027    | 0.219263           |
| 8                                       | 1.162074  | -2.032373    | -0.443156          |
| 17                                      | 3.282965  | 3.382942     | 0.468251           |
| 8                                       | -4.160234 | 0.731983     | -1.994816          |
| 8                                       | 4.035869  | -2.487577    | -1.497469          |
| 1                                       | -5.894487 | 1.708908     | 1.064169           |
| 1                                       | -8.253687 | 1.179069     | 0.556405           |
| 1                                       | -8.932475 | -1.160592    | 0.093457           |
| 1                                       | -7.226910 | -2.965605    | 0.146917           |
| 1                                       | -4.872575 | -2.429117    | 0.660241           |
| 1                                       | -3.358607 | -0.765651    | 1.849610           |
| 1                                       | 0.678463  | 2.426710     | -0.093635          |
| 1                                       | -3.015681 | -0.939250    | -0.605908          |
| 1                                       | -3.687505 | 0.958264     | 1.683464           |
| 1                                       | 5.615454  | -0.417897    | -1.146173          |
| 1                                       | 5.382634  | 1.738698     | 0.005865           |
| 1                                       | 5.266492  | 0.934340     | 1.568321           |
| 1                                       | 7.712673  | 0.572470     | -0.237786          |
| 1                                       | 7.457163  | -0.279874    | 1.296735           |
| 1                                       | 7.769730  | -1.197729    | -0.193525          |
| 1                                       | 3.088433  | -2.601990    | -1.618874          |
| SCF Energy                              |           | -1813.820831 | (Hartree)          |
| zpe                                     |           | 0.327800     | (Hartree)          |
| Thermal correction to Enthalpy          |           |              | 0.354495 (Hartree) |
| Thermal correction to Gibbs Free Energy |           |              | 0.269640 (Hartree) |
| Enthalpy                                |           | -1813.466336 | (Hartree)          |
| Free Energy                             |           | -1813.551191 | (Hartree)          |

### TS 3-TI1

| Atom | X         | Y         | Z (Angstrom) |
|------|-----------|-----------|--------------|
| 6    | 5.176085  | 0.286364  | 0.030403     |
| 6    | 3.689710  | 0.514766  | 0.026269     |
| 6    | 2.826630  | -0.564804 | 0.196012     |
| 6    | 3.403254  | -1.900128 | 0.591984     |
| 8    | 4.771585  | -2.019289 | 0.525036     |
| 6    | 5.481040  | -1.144060 | -0.362539    |
| 6    | 1.396441  | -0.426767 | 0.067361     |
| 6    | 0.900672  | 0.904750  | -0.141197    |
| 6    | 1.783628  | 1.978445  | -0.247136    |
| 6    | 3.142670  | 1.787722  | -0.175199    |
| 6    | -0.546741 | 1.232395  | -0.259728    |
| 8    | -0.941547 | 2.403574  | -0.435641    |
| 17   | 4.197211  | 3.195846  | -0.332936    |
| 8    | 0.616666  | -1.448851 | 0.111487     |
| 8    | 2.878980  | -2.605137 | 1.470338     |
| 6    | 6.948052  | -1.494559 | -0.260840    |
| 7    | -1.411298 | 0.213132  | -0.169638    |
| 6    | -2.844779 | 0.403336  | -0.213933    |
| 6    | -3.360944 | 1.336895  | 0.908435     |
| 8    | -4.281423 | 2.134490  | 0.593845     |
| 6    | -3.509326 | -0.979842 | -0.102212    |
| 6    | -5.009906 | -0.928730 | -0.226101    |
| 6    | -5.612776 | -0.838500 | -1.482280    |
| 6    | -6.995534 | -0.759190 | -1.603687    |
| 6    | -7.798275 | -0.769690 | -0.465944    |
| 6    | -7.207988 | -0.860711 | 0.790327     |



|                                         |           |              |           |                    |
|-----------------------------------------|-----------|--------------|-----------|--------------------|
| 6                                       | -5.823373 | -0.939601    | 0.907061  |                    |
| 8                                       | -2.867270 | 1.209002     | 2.055701  |                    |
| 1                                       | -5.365953 | -1.007362    | 1.889481  |                    |
| 1                                       | -7.825534 | -0.870738    | 1.681965  |                    |
| 1                                       | -8.877076 | -0.709479    | -0.559086 |                    |
| 1                                       | -7.447823 | -0.691735    | -2.587274 |                    |
| 1                                       | -4.990330 | -0.831206    | -2.372049 |                    |
| 1                                       | -3.096805 | -1.612396    | -0.893561 |                    |
| 1                                       | -0.986803 | -0.704238    | -0.012121 |                    |
| 1                                       | 1.381442  | 2.972323     | -0.401029 |                    |
| 1                                       | -3.123868 | 0.857955     | -1.168623 |                    |
| 1                                       | -3.227675 | -1.424721    | 0.856878  |                    |
| 1                                       | 5.120171  | -1.327836    | -1.379754 |                    |
| 1                                       | 5.662683  | 0.961598     | -0.676030 |                    |
| 1                                       | 5.595617  | 0.496447     | 1.021858  |                    |
| 1                                       | 7.525875  | -0.858448    | -0.935711 |                    |
| 1                                       | 7.312071  | -1.339528    | 0.758795  |                    |
| 1                                       | 7.116025  | -2.536720    | -0.541708 |                    |
| 8                                       | 3.006689  | -2.859914    | -1.144847 |                    |
| 1                                       | 2.053804  | -2.734776    | -1.104357 |                    |
| SCF Energy                              |           | -1814.332560 | (Hartree) |                    |
| zpe                                     |           | 0.340866     | (Hartree) |                    |
| Thermal correction to Enthalpy          |           |              |           | 0.367735 (Hartree) |
| Thermal correction to Gibbs Free Energy |           |              |           | 0.281933 (Hartree) |
| Enthalpy                                |           | -1813.964825 | (Hartree) |                    |
| Free Energy                             |           | -1814.050627 | (Hartree) |                    |

### T11

| Atom | X         | Y         | Z (Angstrom) |
|------|-----------|-----------|--------------|
| 6    | -5.804390 | -1.180246 | 0.632446     |
| 6    | -4.999269 | -0.862084 | -0.461195    |
| 6    | -5.610056 | -0.422419 | -1.637320    |
| 6    | -6.992319 | -0.300232 | -1.718425    |
| 6    | -7.787125 | -0.617955 | -0.619907    |
| 6    | -7.189096 | -1.059599 | 0.555492     |
| 6    | -3.497897 | -0.947584 | -0.369154    |
| 6    | -2.835520 | 0.421652  | -0.142683    |
| 6    | -3.350689 | 1.054739  | 1.172862     |
| 8    | -2.868801 | 0.634444  | 2.253629     |
| 7    | -1.401381 | 0.234009  | -0.147795    |
| 6    | -0.545469 | 1.264999  | -0.096102    |
| 8    | -0.953065 | 2.445177  | -0.098519    |
| 6    | 0.902975  | 0.936807  | -0.049504    |
| 6    | 1.407809  | -0.394371 | 0.061115     |
| 6    | 2.833738  | -0.548479 | 0.143694     |
| 6    | 3.694795  | 0.522883  | -0.026289    |
| 6    | 3.145713  | 1.812114  | -0.137624    |
| 6    | 1.789725  | 2.017104  | -0.129948    |
| 6    | 3.360315  | -1.960914 | 0.474794     |
| 8    | 4.791405  | -2.040479 | 0.338639     |
| 6    | 5.401704  | -1.167754 | -0.607187    |
| 6    | 5.170991  | 0.265928  | -0.159018    |
| 8    | 3.030721  | -2.362583 | 1.687818     |
| 6    | 6.869966  | -1.527446 | -0.689831    |
| 8    | 0.639388  | -1.441349 | 0.070078     |
| 17   | 4.210881  | 3.215252  | -0.287191    |
| 8    | -4.254188 | 1.923946  | 1.066467     |

|                                         |           |              |           |          |           |
|-----------------------------------------|-----------|--------------|-----------|----------|-----------|
| 8                                       | 2.867780  | -2.862913    | -0.561598 |          |           |
| 1                                       | -5.341043 | -1.521793    | 1.552984  |          |           |
| 1                                       | -7.800262 | -1.311407    | 1.415547  |          |           |
| 1                                       | -8.865525 | -0.521835    | -0.682117 |          |           |
| 1                                       | -7.450762 | 0.042870     | -2.639636 |          |           |
| 1                                       | -4.994179 | -0.171999    | -2.495997 |          |           |
| 1                                       | -3.092731 | -1.363912    | -1.296032 |          |           |
| 1                                       | -0.975286 | -0.692912    | -0.075746 |          |           |
| 1                                       | 1.386564  | 3.019116     | -0.212233 |          |           |
| 1                                       | -3.113369 | 1.092588     | -0.959441 |          |           |
| 1                                       | -3.209221 | -1.616204    | 0.447436  |          |           |
| 1                                       | 4.934221  | -1.315222    | -1.590433 |          |           |
| 1                                       | 5.604594  | 0.953630     | -0.889147 |          |           |
| 1                                       | 5.687311  | 0.436893     | 0.793513  |          |           |
| 1                                       | 7.375799  | -0.871691    | -1.403213 |          |           |
| 1                                       | 7.350400  | -1.411212    | 0.286207  |          |           |
| 1                                       | 6.998459  | -2.560253    | -1.022593 |          |           |
| 1                                       | 1.908392  | -2.696814    | -0.541699 |          |           |
| SCF Energy                              |           | -1814.349196 | (Hartree) |          |           |
| zpe                                     |           | 0.344235     | (Hartree) |          |           |
| Thermal correction to Enthalpy          |           |              |           | 0.370427 | (Hartree) |
| Thermal correction to Gibbs Free Energy |           |              |           | 0.286337 | (Hartree) |
| Enthalpy                                |           | -1813.978769 | (Hartree) |          |           |
| Free Energy                             |           | -1814.062859 | (Hartree) |          |           |

#### TS T11-4

| Atom | X         | Y         | Z (Angstrom) |
|------|-----------|-----------|--------------|
| 6    | -5.855024 | -1.027607 | 0.697042     |
| 6    | -5.015917 | -0.891036 | -0.409189    |
| 6    | -5.590439 | -0.664852 | -1.661341    |
| 6    | -6.970503 | -0.575500 | -1.805003    |
| 6    | -7.798644 | -0.711577 | -0.693869    |
| 6    | -7.236674 | -0.938047 | 0.558177     |
| 6    | -3.518832 | -0.954753 | -0.255177    |
| 6    | -2.858246 | 0.431589  | -0.159973    |
| 6    | -3.415972 | 1.209607  | 1.056893     |
| 8    | -2.969986 | 0.918113  | 2.193833     |
| 7    | -1.426670 | 0.232431  | -0.091708    |
| 6    | -0.553580 | 1.248541  | -0.094781    |
| 8    | -0.932418 | 2.431898  | -0.195207    |
| 6    | 0.891201  | 0.898943  | 0.010475     |
| 6    | 1.372211  | -0.426419 | 0.228740     |
| 6    | 2.783915  | -0.594858 | 0.373310     |
| 6    | 3.684582  | 0.451501  | 0.163628     |
| 6    | 3.156387  | 1.723607  | -0.090795    |
| 6    | 1.798328  | 1.947028  | -0.136767    |
| 6    | 3.342436  | -1.949737 | 0.743635     |
| 8    | 4.538942  | -2.064647 | -0.836161    |
| 6    | 5.392398  | -0.969872 | -0.984792    |
| 6    | 5.144969  | 0.128748  | 0.088615     |
| 8    | 4.103251  | -2.097876 | 1.721201     |
| 6    | 6.863743  | -1.381808 | -0.944056    |
| 8    | 0.574190  | -1.459232 | 0.285667     |
| 17   | 4.220130  | 3.109564  | -0.363602    |
| 8    | -4.316544 | 2.054549  | 0.818523     |
| 8    | 2.543291  | -3.010915 | 0.409715     |
| 1    | -5.419273 | -1.201623 | 1.676207     |

|                                         |           |              |           |                    |
|-----------------------------------------|-----------|--------------|-----------|--------------------|
| 1                                       | -7.874198 | -1.045717    | 1.429067  |                    |
| 1                                       | -8.875133 | -0.642423    | -0.805428 |                    |
| 1                                       | -7.401575 | -0.403473    | -2.785373 |                    |
| 1                                       | -4.948075 | -0.560012    | -2.530529 |                    |
| 1                                       | -3.081055 | -1.472281    | -1.113394 |                    |
| 1                                       | -1.024193 | -0.695684    | 0.045704  |                    |
| 1                                       | 1.415524  | 2.945102     | -0.311108 |                    |
| 1                                       | -3.101298 | 1.006742     | -1.057321 |                    |
| 1                                       | -3.259670 | -1.524473    | 0.642593  |                    |
| 1                                       | 5.210691  | -0.481738    | -1.961984 |                    |
| 1                                       | 5.729450  | 1.011013     | -0.170965 |                    |
| 1                                       | 5.503259  | -0.234579    | 1.053640  |                    |
| 1                                       | 7.526066  | -0.521893    | -1.093446 |                    |
| 1                                       | 7.098870  | -1.836537    | 0.024451  |                    |
| 1                                       | 7.076864  | -2.115625    | -1.727187 |                    |
| 1                                       | 1.644400  | -2.612511    | 0.219092  |                    |
| SCF Energy                              |           | -1814.331686 | (Hartree) |                    |
| zpe                                     |           | 0.341762     | (Hartree) |                    |
| Thermal correction to Enthalpy          |           |              |           | 0.367949 (Hartree) |
| Thermal correction to Gibbs Free Energy |           |              |           | 0.283336 (Hartree) |
| Enthalpy                                |           | -1813.963737 | (Hartree) |                    |
| Free Energy                             |           | -1814.048350 | (Hartree) |                    |

#### TII with H<sub>2</sub>O

| Atom | X         | Y         | Z (Angstrom) |
|------|-----------|-----------|--------------|
| 6    | -5.752972 | -0.843512 | -1.404682    |
| 6    | -5.154165 | -0.955402 | -0.148079    |
| 6    | -5.972621 | -1.017922 | 0.979471     |
| 6    | -7.358401 | -0.968898 | 0.857266     |
| 6    | -7.944222 | -0.853808 | -0.398546    |
| 6    | -7.136106 | -0.791925 | -1.531231    |
| 6    | -3.653552 | -0.975694 | -0.016082    |
| 6    | -3.007299 | 0.409059  | -0.197415    |
| 6    | -3.566261 | 1.403133  | 0.850979     |
| 8    | -3.083149 | 1.369745  | 2.009414     |
| 7    | -1.573100 | 0.243577  | -0.102363    |
| 6    | -0.715840 | 1.255410  | -0.292582    |
| 8    | -1.114076 | 2.392496  | -0.615938    |
| 6    | 0.731249  | 0.958133  | -0.102918    |
| 6    | 1.610448  | 2.034029  | -0.246880    |
| 6    | 2.966646  | 1.865414  | -0.090987    |
| 6    | 3.511506  | 0.609311  | 0.202033     |
| 6    | 2.652005  | -0.473610 | 0.333440     |
| 6    | 1.236566  | -0.338759 | 0.217967     |
| 8    | 0.457352  | -1.372345 | 0.396001     |
| 6    | 3.320782  | -1.831566 | 0.628132     |
| 8    | 3.711386  | -1.987723 | 1.873896     |
| 6    | 4.975216  | 0.356912  | 0.422415     |
| 6    | 5.457052  | -0.929051 | -0.266044    |
| 8    | 4.442144  | -1.936128 | -0.342588    |
| 17   | 4.007001  | 3.284669  | -0.255150    |
| 8    | 2.503207  | -2.900704 | 0.152903     |
| 6    | 6.718143  | -1.472455 | 0.383547     |
| 8    | -4.503926 | 2.150770  | 0.471916     |
| 8    | 3.223255  | -1.341273 | -2.793594    |
| 1    | -5.518371 | -1.105085 | 1.961719     |
| 1    | -7.979648 | -1.019201 | 1.745042     |

|                                         |           |              |           |          |           |
|-----------------------------------------|-----------|--------------|-----------|----------|-----------|
| 1                                       | -9.023514 | -0.814008    | -0.496876 |          |           |
| 1                                       | -7.585605 | -0.703842    | -2.514459 |          |           |
| 1                                       | -5.127381 | -0.796279    | -2.291069 |          |           |
| 1                                       | -3.227068 | -1.644208    | -0.769771 |          |           |
| 1                                       | -1.150640 | -0.644543    | 0.175857  |          |           |
| 1                                       | 1.204429  | 3.011470     | -0.476565 |          |           |
| 1                                       | -3.263686 | 0.798857     | -1.186108 |          |           |
| 1                                       | -3.371856 | -1.365838    | 0.966558  |          |           |
| 1                                       | 5.678566  | -0.683933    | -1.310546 |          |           |
| 1                                       | 5.585270  | 1.184273     | 0.060977  |          |           |
| 1                                       | 5.147613  | 0.276934     | 1.500640  |          |           |
| 1                                       | 7.509887  | -0.717586    | 0.352636  |          |           |
| 1                                       | 6.530660  | -1.735171    | 1.427911  |          |           |
| 1                                       | 7.070899  | -2.360903    | -0.146293 |          |           |
| 1                                       | 1.580659  | -2.558047    | 0.230138  |          |           |
| 1                                       | 2.594921  | -0.669015    | -2.513300 |          |           |
| 1                                       | 3.638964  | -1.629756    | -1.957300 |          |           |
| SCF Energy                              |           | -1890.801337 | (Hartree) |          |           |
| zpe                                     |           | 0.368784     | (Hartree) |          |           |
| Thermal correction to Enthalpy          |           |              |           | 0.398106 | (Hartree) |
| Thermal correction to Gibbs Free Energy |           |              |           | 0.307178 | (Hartree) |
| Enthalpy                                |           | -1890.403231 | (Hartree) |          |           |
| Free Energy                             |           | -1890.494159 | (Hartree) |          |           |

**TS T11-4 with H<sub>2</sub>O**

| Atom | X         | Y         | Z (Angstrom) |
|------|-----------|-----------|--------------|
| 6    | 5.975798  | -1.014847 | -0.899383    |
| 6    | 5.145671  | -0.934526 | 0.218490     |
| 6    | 5.730933  | -0.786509 | 1.477745     |
| 6    | 7.112215  | -0.717163 | 1.615928     |
| 6    | 7.932020  | -0.797253 | 0.492813     |
| 6    | 7.359687  | -0.947770 | -0.765481    |
| 6    | 3.646618  | -0.973387 | 0.071723     |
| 6    | 2.987453  | 0.409904  | 0.209852     |
| 6    | 3.555969  | 1.382806  | -0.852894    |
| 8    | 3.097245  | 1.312689  | -2.019519    |
| 7    | 1.555065  | 0.234101  | 0.097447     |
| 6    | 0.697625  | 1.257357  | 0.210657     |
| 8    | 1.091924  | 2.406754  | 0.488821     |
| 6    | -0.746831 | 0.958873  | 0.000046     |
| 6    | -1.246910 | -0.329982 | -0.354460    |
| 6    | -2.656007 | -0.450394 | -0.557082    |
| 6    | -3.535936 | 0.605409  | -0.317220    |
| 6    | -2.991683 | 1.840695  | 0.053016     |
| 6    | -1.633077 | 2.018631  | 0.186725     |
| 6    | -5.006335 | 0.321396  | -0.352130    |
| 6    | -5.348197 | -0.855470 | 0.599726     |
| 8    | -4.454207 | -1.929307 | 0.468727     |
| 6    | -3.252543 | -1.773956 | -0.996366    |
| 8    | -3.959492 | -1.853648 | -2.027497    |
| 8    | -2.482169 | -2.872849 | -0.688815    |
| 6    | -6.790939 | -1.296657 | 0.376673     |
| 8    | -0.469508 | -1.373304 | -0.471789    |
| 17   | -4.034379 | 3.231904  | 0.372640     |
| 8    | 4.477579  | 2.150645  | -0.475054    |
| 8    | -2.808052 | -1.734875 | 2.521205     |
| 1    | 5.532008  | -1.129227 | -1.883643    |

|                                         |              |           |                    |
|-----------------------------------------|--------------|-----------|--------------------|
| 1                                       | 7.990072     | -1.011839 | -1.645874          |
| 1                                       | 9.009784     | -0.743174 | 0.600453           |
| 1                                       | 7.551323     | -0.601436 | 2.601017           |
| 1                                       | 5.096133     | -0.724523 | 2.356631           |
| 1                                       | 3.218690     | -1.626802 | 0.837582           |
| 1                                       | 1.143997     | -0.660293 | -0.173605          |
| 1                                       | -1.234502    | 2.988146  | 0.458848           |
| 1                                       | 3.225092     | 0.825331  | 1.192689           |
| 1                                       | 3.380005     | -1.391385 | -0.903507          |
| 1                                       | -5.268053    | -0.452191 | 1.624177           |
| 1                                       | -5.583971    | 1.193474  | -0.047532          |
| 1                                       | -5.311198    | 0.060616  | -1.367388          |
| 1                                       | -7.485291    | -0.458085 | 0.495382           |
| 1                                       | -6.908204    | -1.704023 | -0.632989          |
| 1                                       | -7.068474    | -2.072864 | 1.095555           |
| 1                                       | -1.576326    | -2.506991 | -0.477939          |
| 1                                       | -2.153644    | -1.090177 | 2.239674           |
| 1                                       | -3.418181    | -1.827417 | 1.734570           |
| SCF Energy                              | -1890.793696 | (Hartree) |                    |
| zpe                                     | 0.365807     | (Hartree) |                    |
| Thermal correction to Enthalpy          |              |           | 0.395077 (Hartree) |
| Thermal correction to Gibbs Free Energy |              |           | 0.303210 (Hartree) |
| Enthalpy                                | -1890.398619 | (Hartree) |                    |
| Free Energy                             | -1890.490486 | (Hartree) |                    |

#### 4

| Atom | X         | Y         | Z (Angstrom) |
|------|-----------|-----------|--------------|
| 6    | -3.586532 | -0.262996 | 0.382090     |
| 6    | -2.745823 | 0.838651  | 0.305773     |
| 6    | -1.316600 | 0.745325  | 0.340649     |
| 6    | -0.768963 | -0.569103 | 0.487652     |
| 6    | -1.621916 | -1.673189 | 0.577553     |
| 6    | -2.987137 | -1.526576 | 0.523626     |
| 6    | -3.332929 | 2.229870  | 0.168474     |
| 8    | -3.291042 | 2.986878  | 1.165928     |
| 8    | -0.595604 | 1.812552  | 0.228483     |
| 6    | 0.690905  | -0.848223 | 0.555611     |
| 7    | 1.503298  | 0.217584  | 0.535576     |
| 6    | 2.948535  | 0.118653  | 0.559725     |
| 6    | 3.539737  | 1.436651  | 1.093448     |
| 8    | 4.474608  | 1.352247  | 1.929683     |
| 17   | -3.984599 | -2.981490 | 0.653605     |
| 6    | -5.082497 | -0.098106 | 0.285052     |
| 6    | -5.646172 | -0.373373 | -1.119817    |
| 6    | -7.124780 | -0.020220 | -1.176239    |
| 8    | -3.842367 | 2.542193  | -0.947899    |
| 8    | 1.131638  | -2.013798 | 0.642859     |
| 6    | 3.502498  | -0.185222 | -0.850925    |
| 6    | 4.995674  | -0.379656 | -0.863780    |
| 6    | 5.553798  | -1.586443 | -0.435639    |
| 6    | 6.932415  | -1.763012 | -0.408960    |
| 6    | 7.776996  | -0.731376 | -0.811237    |
| 6    | 7.231941  | 0.474761  | -1.238952    |
| 6    | 5.851071  | 0.647610  | -1.263374    |
| 8    | 3.063393  | 2.504823  | 0.633805     |
| 8    | -4.921466 | 0.318564  | -2.137009    |
| 1    | 1.043280  | 1.123378  | 0.408718     |

|                                         |           |              |           |                    |
|-----------------------------------------|-----------|--------------|-----------|--------------------|
| 1                                       | 3.006724  | -1.091370    | -1.208847 |                    |
| 1                                       | 3.220728  | 0.635345     | -1.516474 |                    |
| 1                                       | 4.898263  | -2.393620    | -0.122287 |                    |
| 1                                       | 5.429223  | 1.591115     | -1.596228 |                    |
| 1                                       | 7.349510  | -2.707310    | -0.075803 |                    |
| 1                                       | 8.852574  | -0.869022    | -0.792399 |                    |
| 1                                       | 7.882414  | 1.283198     | -1.555090 |                    |
| 1                                       | 3.236172  | -0.688993    | 1.233972  |                    |
| 1                                       | -1.186527 | -2.658249    | 0.693303  |                    |
| 1                                       | -5.363663 | 0.916298     | 0.581562  |                    |
| 1                                       | -5.582302 | -0.775756    | 0.980978  |                    |
| 1                                       | -5.524013 | -1.437367    | -1.343588 |                    |
| 1                                       | -7.533141 | -0.241758    | -2.165425 |                    |
| 1                                       | -7.688254 | -0.595874    | -0.436042 |                    |
| 1                                       | -7.270037 | 1.045106     | -0.970127 |                    |
| 1                                       | -4.570450 | 1.155281     | -1.767734 |                    |
| SCF Energy                              |           | -1814.384313 | (Hartree) |                    |
| zpe                                     |           | 0.343480     | (Hartree) |                    |
| Thermal correction to Enthalpy          |           |              |           | 0.370807 (Hartree) |
| Thermal correction to Gibbs Free Energy |           |              |           | 0.283144 (Hartree) |
| Enthalpy                                |           | -1814.013506 | (Hartree) |                    |
| Free Energy                             |           | -1814.101169 | (Hartree) |                    |

#### TS 4-TI2

| Atom | X         | Y         | Z (Angstrom) |
|------|-----------|-----------|--------------|
| 6    | -5.778664 | -1.021469 | -1.220388    |
| 6    | -5.003947 | 0.138611  | -1.189363    |
| 6    | -5.653135 | 1.370973  | -1.082501    |
| 6    | -7.039442 | 1.442756  | -1.007494    |
| 6    | -7.802180 | 0.277879  | -1.038179    |
| 6    | -7.167139 | -0.954932 | -1.145597    |
| 6    | -3.499097 | 0.070531  | -1.224513    |
| 6    | -2.843182 | 0.223210  | 0.164569     |
| 6    | -3.399715 | -0.861272 | 1.109860     |
| 8    | -2.944587 | -2.028410 | 0.983745     |
| 7    | -1.397723 | 0.163371  | 0.024761     |
| 6    | -0.594107 | 0.964430  | 0.857745     |
| 8    | -0.946536 | 2.163867  | 1.073838     |
| 6    | 0.881175  | 0.646811  | 0.675285     |
| 6    | 1.377468  | -0.690056 | 0.576344     |
| 6    | 2.782681  | -0.836564 | 0.385769     |
| 6    | 3.660271  | 0.244064  | 0.268155     |
| 6    | 3.113237  | 1.523000  | 0.381569     |
| 6    | 1.756678  | 1.717962  | 0.583089     |
| 6    | 5.126289  | 0.020658  | -0.010633    |
| 6    | 5.496345  | 0.154907  | -1.496989    |
| 8    | 4.637339  | -0.614898 | -2.339715    |
| 6    | 3.322345  | -2.250836 | 0.313600     |
| 8    | 3.697435  | -2.683721 | -0.817075    |
| 8    | 0.605514  | -1.732837 | 0.650758     |
| 17   | 4.146342  | 2.959373  | 0.276349     |
| 8    | 3.384423  | -2.912470 | 1.377532     |
| 8    | -4.306872 | -0.523990 | 1.916807     |
| 6    | 6.951348  | -0.227403 | -1.722716    |
| 1    | -1.048331 | -0.792462 | 0.025129     |
| 1    | -3.107407 | 0.869633  | -1.859541    |
| 1    | -3.179445 | -0.882806 | -1.656673    |

|                                         |           |              |                    |
|-----------------------------------------|-----------|--------------|--------------------|
| 1                                       | -5.062698 | 2.282101     | -1.057318          |
| 1                                       | -5.287370 | -1.986444    | -1.300876          |
| 1                                       | -7.526289 | 2.408768     | -0.926440          |
| 1                                       | -8.883800 | 0.332163     | -0.980446          |
| 1                                       | -7.752799 | -1.867624    | -1.171533          |
| 1                                       | -3.109379 | 1.199641     | 0.568599           |
| 1                                       | 1.361483  | 2.723706     | 0.665816           |
| 1                                       | 5.426373  | -0.972669    | 0.335273           |
| 1                                       | 5.732076  | 0.739725     | 0.545852           |
| 1                                       | 5.350016  | 1.196555     | -1.799736          |
| 1                                       | 7.220333  | -0.104253    | -2.774923          |
| 1                                       | 7.613827  | 0.403472     | -1.122676          |
| 1                                       | 7.118408  | -1.271812    | -1.440016          |
| 1                                       | 4.317177  | -1.397891    | -1.844006          |
| 8                                       | -0.802137 | 0.170094     | 2.586423           |
| 1                                       | -0.605935 | -0.753378    | 2.398079           |
| SCF Energy                              |           | -1890.300588 | (Hartree)          |
| zpe                                     |           | 0.354545     | (Hartree)          |
| Thermal correction to Enthalpy          |           |              | 0.383434 (Hartree) |
| Thermal correction to Gibbs Free Energy |           |              | 0.293096 (Hartree) |
| Enthalpy                                |           | -1889.917154 | (Hartree)          |
| Free Energy                             |           | -1890.007492 | (Hartree)          |

## TI2

| Atom | X         | Y         | Z (Angstrom) |
|------|-----------|-----------|--------------|
| 6    | -1.694867 | 1.659488  | -0.766221    |
| 6    | -0.889670 | 0.549300  | -0.946646    |
| 6    | -1.441345 | -0.757087 | -0.796013    |
| 6    | -2.822035 | -0.846659 | -0.470454    |
| 6    | -3.631274 | 0.277005  | -0.268199    |
| 6    | -3.034919 | 1.526564  | -0.430550    |
| 6    | 0.609468  | 0.745219  | -1.280651    |
| 8    | 0.933349  | 1.949234  | -1.740807    |
| 8    | -0.710798 | -1.832856 | -0.946665    |
| 6    | -3.419191 | -2.233000 | -0.343034    |
| 8    | -3.589934 | -2.899985 | -1.391780    |
| 6    | -5.078567 | 0.121878  | 0.131068     |
| 6    | -5.325606 | 0.270190  | 1.641091     |
| 6    | -6.774468 | -0.048760 | 1.979253     |
| 17   | -3.983046 | 3.010701  | -0.225283    |
| 7    | 1.347070  | 0.400196  | -0.033943    |
| 6    | 2.796731  | 0.299334  | -0.181768    |
| 6    | 3.284930  | -1.022215 | -0.810775    |
| 8    | 4.180406  | -0.959081 | -1.697281    |
| 6    | 3.456932  | 0.453438  | 1.205113     |
| 6    | 4.961174  | 0.365022  | 1.169642     |
| 6    | 5.622107  | -0.822720 | 1.485433     |
| 6    | 7.008779  | -0.912635 | 1.403913     |
| 6    | 7.757244  | 0.189316  | 1.003496     |
| 6    | 7.109589  | 1.381167  | 0.688963     |
| 6    | 5.724304  | 1.465514  | 0.771758     |
| 8    | 2.797617  | -2.093648 | -0.361125    |
| 8    | -4.438840 | -0.538222 | 2.416132     |
| 8    | -3.726717 | -2.640606 | 0.817015     |
| 8    | 0.920934  | -0.242719 | -2.326704    |
| 1    | 1.009819  | -0.501800 | 0.295017     |
| 1    | 3.155963  | 1.422302  | 1.611509     |

|                                         |           |              |           |           |
|-----------------------------------------|-----------|--------------|-----------|-----------|
| 1                                       | 3.055748  | -0.321312    | 1.866577  |           |
| 1                                       | 5.224264  | 2.397161     | 0.523676  |           |
| 1                                       | 5.042538  | -1.687766    | 1.793476  |           |
| 1                                       | 7.685077  | 2.247145     | 0.379461  |           |
| 1                                       | 8.837571  | 0.120482     | 0.937339  |           |
| 1                                       | 7.504101  | -1.845481    | 1.651450  |           |
| 1                                       | 3.131785  | 1.120227     | -0.817671 |           |
| 1                                       | -1.261624 | 2.645507     | -0.889104 |           |
| 1                                       | -5.451831 | -0.855171    | -0.189753 |           |
| 1                                       | -5.692702 | 0.869073     | -0.377127 |           |
| 1                                       | -5.111343 | 1.304551     | 1.928068  |           |
| 1                                       | -6.962630 | 0.106405     | 3.044643  |           |
| 1                                       | -7.453662 | 0.595134     | 1.412793  |           |
| 1                                       | -7.001153 | -1.091406    | 1.734221  |           |
| 1                                       | -4.196436 | -1.333603    | 1.896731  |           |
| 1                                       | 0.522779  | -1.073824    | -1.996686 |           |
| SCF Energy                              |           | -1890.311370 | (Hartree) |           |
| zpe                                     |           | 0.357898     | (Hartree) |           |
| Thermal correction to Enthalpy          |           |              | 0.386032  | (Hartree) |
| Thermal correction to Gibbs Free Energy |           |              | 0.298185  | (Hartree) |
| Enthalpy                                |           | -1889.925338 | (Hartree) |           |
| Free Energy                             |           | -1890.013185 | (Hartree) |           |

### TI2 with H<sub>2</sub>O

| Y  | Z (Angstrom) |           |           |
|----|--------------|-----------|-----------|
| 6  | -5.319832    | -0.555913 | -1.710412 |
| 6  | -4.868839    | -1.004667 | -0.465706 |
| 6  | -5.814014    | -1.403785 | 0.479712  |
| 6  | -7.175608    | -1.358650 | 0.191111  |
| 6  | -7.611937    | -0.909395 | -1.050520 |
| 6  | -6.677728    | -0.507802 | -2.002486 |
| 6  | -3.395795    | -0.999031 | -0.147600 |
| 6  | -2.866277    | 0.418223  | 0.140590  |
| 6  | -3.622323    | 1.036590  | 1.333825  |
| 8  | -3.509154    | 0.474829  | 2.455300  |
| 7  | -1.419760    | 0.430724  | 0.397446  |
| 6  | -0.586104    | 0.836778  | -0.778838 |
| 8  | -0.892648    | 0.264707  | -1.945135 |
| 6  | 0.883673     | 0.584132  | -0.364354 |
| 6  | 1.832883     | 1.579853  | -0.531848 |
| 6  | 3.174313     | 1.356136  | -0.254434 |
| 6  | 3.630113     | 0.130918  | 0.226518  |
| 6  | 2.669895     | -0.866490 | 0.424971  |
| 6  | 1.289256     | -0.700007 | 0.118272  |
| 8  | 0.454575     | -1.689391 | 0.273708  |
| 6  | 3.090594     | -2.205898 | 0.993557  |
| 8  | 3.752812     | -2.986944 | 0.245831  |
| 6  | 5.091518     | -0.136007 | 0.492637  |
| 6  | 5.889303     | -0.504126 | -0.768582 |
| 8  | 5.270478     | -1.554733 | -1.512741 |
| 17 | 4.302265     | 2.700467  | -0.511018 |
| 8  | -0.814543    | 2.271609  | -0.919026 |
| 8  | 2.775961     | -2.468118 | 2.179702  |
| 6  | 7.320706     | -0.873602 | -0.409917 |
| 8  | -4.312772    | 2.069588  | 1.115883  |
| 1  | -1.100919    | -0.511025 | 0.625238  |
| 1  | -2.828689    | -1.398058 | -0.992280 |



|                                         |           |              |           |          |           |
|-----------------------------------------|-----------|--------------|-----------|----------|-----------|
| 1                                       | -3.193704 | -1.635360    | 0.719699  |          |           |
| 1                                       | -4.594995 | -0.240342    | -2.454989 |          |           |
| 1                                       | -5.478901 | -1.753916    | 1.451226  |          |           |
| 1                                       | -7.009100 | -0.156685    | -2.974006 |          |           |
| 1                                       | -8.672143 | -0.871842    | -1.275851 |          |           |
| 1                                       | -7.895716 | -1.675402    | 0.937926  |          |           |
| 1                                       | -3.067305 | 1.045308     | -0.729196 |          |           |
| 1                                       | 1.524030  | 2.552727     | -0.894434 |          |           |
| 1                                       | 5.198240  | -0.944237    | 1.222132  |          |           |
| 1                                       | 5.562302  | 0.745304     | 0.934771  |          |           |
| 1                                       | 5.903163  | 0.363030     | -1.436788 |          |           |
| 1                                       | 7.890080  | -1.116441    | -1.310807 |          |           |
| 1                                       | 7.818870  | -0.041279    | 0.096183  |          |           |
| 1                                       | 7.336399  | -1.742282    | 0.256383  |          |           |
| 1                                       | 4.751301  | -2.121031    | -0.903288 |          |           |
| 1                                       | -0.701303 | 2.680370     | -0.052179 |          |           |
| 8                                       | -0.694256 | 2.376837     | 2.225119  |          |           |
| 1                                       | -0.970529 | 1.609444     | 1.653201  |          |           |
| 1                                       | -1.517674 | 2.718119     | 2.584144  |          |           |
| SCF Energy                              |           | -1966.760484 | (Hartree) |          |           |
| zpe                                     |           | 0.382904     | (Hartree) |          |           |
| Thermal correction to Enthalpy          |           |              |           | 0.414159 | (Hartree) |
| Thermal correction to Gibbs Free Energy |           |              |           | 0.318319 | (Hartree) |
| Enthalpy                                |           | -1966.346325 | (Hartree) |          |           |
| Free Energy                             |           | -1966.442165 | (Hartree) |          |           |

**TS TI2-intermediate with H<sub>2</sub>O**

| Atom | X         | Y         | Z (Angstrom) |
|------|-----------|-----------|--------------|
| 6    | 1.264982  | -0.141642 | 1.170990     |
| 6    | 0.955642  | 1.215616  | 0.830182     |
| 6    | 1.920934  | 2.020709  | 0.230053     |
| 6    | 3.191204  | 1.543910  | -0.032138    |
| 6    | 3.565808  | 0.236296  | 0.293704     |
| 6    | 2.603504  | -0.570066 | 0.898069     |
| 6    | -0.386563 | 1.801499  | 1.112782     |
| 8    | -1.025245 | 1.549609  | 2.142399     |
| 17   | 4.352642  | 2.658681  | -0.772137    |
| 6    | 4.942242  | -0.299793 | -0.015036    |
| 6    | 5.119231  | -0.764171 | -1.469346    |
| 6    | 6.493727  | -1.385838 | -1.664279    |
| 6    | 2.956507  | -1.986942 | 1.302929     |
| 8    | 3.106003  | -2.228170 | 2.525218     |
| 8    | 0.401382  | -0.966258 | 1.657936     |
| 8    | -0.666796 | 3.002317  | 0.458169     |
| 8    | 3.094749  | -2.849448 | 0.384982     |
| 8    | 4.094798  | -1.672583 | -1.876376    |
| 7    | -1.406285 | 0.975893  | -0.693364    |
| 6    | -2.683068 | 0.427779  | -0.310660    |
| 6    | -2.625388 | -1.067047 | 0.061179     |
| 8    | -3.143652 | -1.435472 | 1.153121     |
| 6    | -3.778835 | 0.627640  | -1.398479    |
| 6    | -5.151019 | 0.173926  | -0.976581    |
| 6    | -5.934184 | 0.972828  | -0.138250    |
| 6    | -7.182895 | 0.544056  | 0.297831     |
| 6    | -7.672631 | -0.698240 | -0.097433    |
| 6    | -6.902862 | -1.504209 | -0.930144    |
| 6    | -5.653327 | -1.070215 | -1.363510    |

|                                         |           |              |           |          |           |
|-----------------------------------------|-----------|--------------|-----------|----------|-----------|
| 8                                       | -2.079530 | -1.855213    | -0.760774 |          |           |
| 1                                       | -0.857093 | 0.241357     | -1.132344 |          |           |
| 1                                       | -3.797564 | 1.696713     | -1.630518 |          |           |
| 1                                       | -3.466868 | 0.096307     | -2.303459 |          |           |
| 1                                       | -5.557916 | 1.943074     | 0.172797  |          |           |
| 1                                       | -5.055536 | -1.705399    | -2.010481 |          |           |
| 1                                       | -7.777046 | 1.180809     | 0.944800  |          |           |
| 1                                       | -8.646714 | -1.034360    | 0.241007  |          |           |
| 1                                       | -7.276735 | -2.472867    | -1.244722 |          |           |
| 1                                       | -3.037164 | 0.959045     | 0.585664  |          |           |
| 1                                       | 1.672174  | 3.042043     | -0.027179 |          |           |
| 1                                       | 5.175284  | -1.137978    | 0.648099  |          |           |
| 1                                       | 5.695945  | 0.467276     | 0.178808  |          |           |
| 1                                       | 5.025856  | 0.104280     | -2.129056 |          |           |
| 1                                       | 6.633846  | -1.689623    | -2.704726 |          |           |
| 1                                       | 7.280041  | -0.669739    | -1.408041 |          |           |
| 1                                       | 6.606564  | -2.267576    | -1.025463 |          |           |
| 1                                       | 3.746466  | -2.143922    | -1.090950 |          |           |
| 1                                       | -1.026185 | 2.546907     | -0.372955 |          |           |
| SCF Energy                              |           | -1890.259013 | (Hartree) |          |           |
| zpe                                     |           | 0.352263     | (Hartree) |          |           |
| Thermal correction to Enthalpy          |           |              |           | 0.381267 | (Hartree) |
| Thermal correction to Gibbs Free Energy |           |              |           | 0.289951 | (Hartree) |
| Enthalpy                                |           | -1889.877746 | (Hartree) |          |           |
| Free Energy                             |           | -1889.969062 | (Hartree) |          |           |

#### Intermediate with H<sub>2</sub>O

| Atom | X         | Y         | Z (Angstrom) |
|------|-----------|-----------|--------------|
| 6    | 0.969440  | 0.477556  | 1.501096     |
| 6    | 0.711735  | 1.622844  | 0.679030     |
| 6    | 1.599906  | 1.933391  | -0.349678    |
| 6    | 2.732617  | 1.185184  | -0.595483    |
| 6    | 3.061805  | 0.078330  | 0.193164     |
| 6    | 2.190412  | -0.231316 | 1.232460     |
| 6    | -0.550168 | 2.494304  | 0.801922     |
| 8    | -0.261235 | 3.784374  | 0.270764     |
| 17   | 3.779555  | 1.684714  | -1.935414    |
| 6    | 4.283499  | -0.764527 | -0.079178    |
| 6    | 4.084618  | -1.817194 | -1.183665    |
| 6    | 5.299868  | -2.728875 | -1.267127    |
| 6    | 2.506829  | -1.395481 | 2.150868     |
| 8    | 2.865375  | -1.138164 | 3.325671     |
| 8    | 0.184072  | 0.036084  | 2.428852     |
| 8    | -1.192373 | 2.526972  | 1.928231     |
| 8    | 2.408109  | -2.567374 | 1.679315     |
| 8    | 2.893976  | -2.582031 | -0.997280    |
| 7    | -1.567514 | 1.950061  | -0.363826    |
| 6    | -2.177884 | 0.628160  | -0.147685    |
| 6    | -1.313691 | -0.469167 | -0.801966    |
| 8    | -1.295203 | -1.589347 | -0.240552    |
| 6    | -3.595704 | 0.630979  | -0.752727    |
| 6    | -4.336871 | -0.661541 | -0.535855    |
| 6    | -4.932697 | -0.932435 | 0.697191     |
| 6    | -5.590461 | -2.136843 | 0.918297     |
| 6    | -5.661596 | -3.090360 | -0.093863    |
| 6    | -5.074013 | -2.828540 | -1.327214    |
| 6    | -4.416795 | -1.621333 | -1.544444    |

|                                         |           |              |           |           |
|-----------------------------------------|-----------|--------------|-----------|-----------|
| 8                                       | -0.735817 | -0.168770    | -1.877565 |           |
| 8                                       | -2.767401 | 4.450153     | -0.255970 |           |
| 1                                       | -1.067287 | 1.923886     | -1.254888 |           |
| 1                                       | -4.147160 | 1.453640     | -0.288384 |           |
| 1                                       | -3.517447 | 0.846001     | -1.822725 |           |
| 1                                       | -4.878520 | -0.191188    | 1.488790  |           |
| 1                                       | -3.953036 | -1.422758    | -2.505933 |           |
| 1                                       | -6.050131 | -2.330985    | 1.881339  |           |
| 1                                       | -6.173599 | -4.030842    | 0.077503  |           |
| 1                                       | -5.125389 | -3.565357    | -2.121463 |           |
| 1                                       | -2.238223 | 0.458353     | 0.927756  |           |
| 1                                       | 1.384918  | 2.780355     | -0.988144 |           |
| 1                                       | 4.593804  | -1.276360    | 0.836095  |           |
| 1                                       | 5.120126  | -0.128529    | -0.378270 |           |
| 1                                       | 3.958679  | -1.302759    | -2.141498 |           |
| 1                                       | 5.173923  | -3.465930    | -2.064430 |           |
| 1                                       | 6.204646  | -2.150268    | -1.475936 |           |
| 1                                       | 5.440718  | -3.260874    | -0.320698 |           |
| 1                                       | 2.694058  | -2.635387    | -0.038047 |           |
| 1                                       | -1.156949 | 4.208589     | 0.123568  |           |
| 1                                       | -2.267736 | 2.725985     | -0.407635 |           |
| 1                                       | -2.816345 | 4.819863     | -1.140770 |           |
| SCF Energy                              |           | -1966.748835 | (Hartree) |           |
| zpe                                     |           | 0.382619     | (Hartree) |           |
| Thermal correction to Enthalpy          |           |              | 0.413584  | (Hartree) |
| Thermal correction to Gibbs Free Energy |           |              | 0.319488  | (Hartree) |
| Enthalpy                                |           | -1966.335251 | (Hartree) |           |
| Free Energy                             |           | -1966.429347 | (Hartree) |           |

**TS Intermediate-5 with H<sub>2</sub>O**

| Atom | X         | Y         | Z (Angstrom) |
|------|-----------|-----------|--------------|
| 6    | -4.871051 | -0.975135 | 0.709502     |
| 6    | -4.294529 | -0.733344 | -0.538952    |
| 6    | -4.361825 | -1.729543 | -1.512484    |
| 6    | -4.989561 | -2.942911 | -1.246727    |
| 6    | -5.559432 | -3.174471 | 0.000756     |
| 6    | -5.499179 | -2.185470 | 0.979185     |
| 6    | -3.586065 | 0.567183  | -0.810381    |
| 6    | -2.173892 | 0.640407  | -0.193462    |
| 6    | -1.274426 | -0.466034 | -0.778912    |
| 8    | -0.693903 | -0.213268 | -1.865459    |
| 7    | -1.590152 | 1.958259  | -0.457049    |
| 6    | -0.496299 | 2.596150  | 0.784111     |
| 8    | -1.165066 | 2.632030  | 1.873626     |
| 6    | 0.726085  | 1.689665  | 0.651950     |
| 6    | 1.573197  | 1.918426  | -0.432808    |
| 6    | 2.674348  | 1.128442  | -0.684056    |
| 6    | 3.015150  | 0.062487  | 0.156433     |
| 6    | 2.185687  | -0.163773 | 1.248087     |
| 6    | 0.993542  | 0.588830  | 1.528573     |
| 8    | 0.245878  | 0.225848  | 2.518448     |
| 6    | 2.521962  | -1.275812 | 2.221562     |
| 8    | 2.344572  | -2.471821 | 1.842989     |
| 6    | 4.204381  | -0.825632 | -0.113583    |
| 6    | 3.935502  | -1.933468 | -1.145382    |
| 8    | 2.744660  | -2.665834 | -0.856070    |
| 17   | 3.666345  | 1.514680  | -2.100737    |

|                                         |           |              |           |                    |
|-----------------------------------------|-----------|--------------|-----------|--------------------|
| 8                                       | -0.241025 | 3.840386     | 0.188774  |                    |
| 8                                       | 2.974474  | -0.953084    | 3.346841  |                    |
| 6                                       | 5.130342  | -2.870697    | -1.238548 |                    |
| 8                                       | -1.230303 | -1.554466    | -0.157099 |                    |
| 8                                       | -2.609008 | 4.732579     | -0.247809 |                    |
| 1                                       | -1.104615 | 1.932237     | -1.353834 |                    |
| 1                                       | -4.165538 | 1.396285     | -0.393156 |                    |
| 1                                       | -3.501923 | 0.732054     | -1.888746 |                    |
| 1                                       | -4.825908 | -0.206479    | 1.475034  |                    |
| 1                                       | -3.911810 | -1.554204    | -2.484954 |                    |
| 1                                       | -5.944844 | -2.356833    | 1.953093  |                    |
| 1                                       | -6.049638 | -4.119119    | 0.209073  |                    |
| 1                                       | -5.032364 | -3.707444    | -2.014843 |                    |
| 1                                       | -2.242525 | 0.514588     | 0.888963  |                    |
| 1                                       | 1.346217  | 2.730034     | -1.111741 |                    |
| 1                                       | 4.539175  | -1.293019    | 0.816801  |                    |
| 1                                       | 5.043448  | -0.230373    | -0.481556 |                    |
| 1                                       | 3.768664  | -1.469268    | -2.122442 |                    |
| 1                                       | 4.950416  | -3.648050    | -1.985606 |                    |
| 1                                       | 6.032200  | -2.322056    | -1.526135 |                    |
| 1                                       | 5.310991  | -3.352606    | -0.272254 |                    |
| 1                                       | 2.586027  | -2.657298    | 0.111449  |                    |
| 1                                       | -1.152514 | 4.286086     | 0.053751  |                    |
| 1                                       | -2.294764 | 2.706692     | -0.485907 |                    |
| 1                                       | -2.633354 | 5.090643     | -1.138246 |                    |
| SCF Energy                              |           | -1966.748414 | (Hartree) |                    |
| zpe                                     |           | 0.380804     | (Hartree) |                    |
| Thermal correction to Enthalpy          |           |              |           | 0.411678 (Hartree) |
| Thermal correction to Gibbs Free Energy |           |              |           | 0.317380 (Hartree) |
| Enthalpy                                |           | -1966.336736 | (Hartree) |                    |
| Free Energy                             |           | -1966.431034 | (Hartree) |                    |

**TS TI2-5 with H<sub>2</sub>O**

| Atom | X         | Y         | Z (Angstrom) |
|------|-----------|-----------|--------------|
| 6    | 0.971659  | 0.497042  | 1.504511     |
| 6    | 0.689386  | 1.627077  | 0.669925     |
| 6    | 1.564681  | 1.932715  | -0.370991    |
| 6    | 2.707069  | 1.197536  | -0.615572    |
| 6    | 3.057738  | 0.106239  | 0.183613     |
| 6    | 2.197854  | -0.200609 | 1.234065     |
| 6    | -0.592007 | 2.482396  | 0.786292     |
| 8    | -0.242764 | 3.802835  | 0.280964     |
| 17   | 3.736660  | 1.694634  | -1.970417    |
| 6    | 4.285919  | -0.726524 | -0.090546    |
| 6    | 4.087741  | -1.790059 | -1.184524    |
| 6    | 5.310993  | -2.690563 | -1.272963    |
| 6    | 2.533642  | -1.352566 | 2.160516     |
| 8    | 2.905289  | -1.081502 | 3.328298     |
| 8    | 0.199816  | 0.056779  | 2.446349     |
| 8    | -1.195627 | 2.547202  | 1.945974     |
| 8    | 2.437405  | -2.529831 | 1.701542     |
| 8    | 2.906220  | -2.564744 | -0.980750    |
| 7    | -1.592506 | 2.009365  | -0.311030    |
| 6    | -2.164844 | 0.667253  | -0.121249    |
| 6    | -1.309951 | -0.416039 | -0.813711    |
| 8    | -1.240127 | -1.537334 | -0.254839    |
| 6    | -3.596224 | 0.647518  | -0.698051    |

|                                         |           |              |                    |
|-----------------------------------------|-----------|--------------|--------------------|
| 6                                       | -4.296396 | -0.671706    | -0.507969          |
| 6                                       | -4.868652 | -0.992081    | 0.724778           |
| 6                                       | -5.487657 | -2.220666    | 0.923993           |
| 6                                       | -5.542535 | -3.151408    | -0.110158          |
| 6                                       | -4.977617 | -2.841481    | -1.343068          |
| 6                                       | -4.360050 | -1.609671    | -1.538254          |
| 8                                       | -0.790385 | -0.111458    | -1.918846          |
| 8                                       | -3.070417 | 4.028549     | -0.303945          |
| 1                                       | -1.104654 | 2.003777     | -1.207803          |
| 1                                       | -4.161529 | 1.437888     | -0.198053          |
| 1                                       | -3.546787 | 0.898288     | -1.762230          |
| 1                                       | -4.826660 | -0.269161    | 1.533983           |
| 1                                       | -3.913849 | -1.375063    | -2.499967          |
| 1                                       | -5.929777 | -2.451287    | 1.887271           |
| 1                                       | -6.024684 | -4.110500    | 0.043904           |
| 1                                       | -5.016032 | -3.560386    | -2.154382          |
| 1                                       | -2.207966 | 0.465143     | 0.949422           |
| 1                                       | 1.333916  | 2.765724     | -1.022224          |
| 1                                       | 4.608899  | -1.227408    | 0.826465           |
| 1                                       | 5.113570  | -0.084804    | -0.402348          |
| 1                                       | 3.947617  | -1.284410    | -2.145070          |
| 1                                       | 5.184549  | -3.434946    | -2.063368          |
| 1                                       | 6.207646  | -2.104465    | -1.495693          |
| 1                                       | 5.466724  | -3.213666    | -0.323922          |
| 1                                       | 2.714334  | -2.610730    | -0.019664          |
| 1                                       | -1.095612 | 4.262206     | 0.203573           |
| 1                                       | -2.391821 | 2.912789     | -0.342909          |
| 1                                       | -3.273320 | 4.256275     | -1.214494          |
| SCF Energy                              |           | -1966.746200 | (Hartree)          |
| zpe                                     |           | 0.378622     | (Hartree)          |
| Thermal correction to Enthalpy          |           |              | 0.409133 (Hartree) |
| Thermal correction to Gibbs Free Energy |           |              | 0.316487 (Hartree) |
| Enthalpy                                |           | -1966.337067 | (Hartree)          |
| Free Energy                             |           | -1966.429713 | (Hartree)          |

### Phenylalanine

| Atom | X         | Y         | Z (Angstrom) |
|------|-----------|-----------|--------------|
| 6    | 2.743101  | 0.849346  | 0.785836     |
| 6    | 3.271755  | -0.325402 | 0.257103     |
| 6    | 2.521802  | -1.068790 | -0.648043    |
| 6    | 1.251224  | -0.639968 | -1.021246    |
| 6    | 0.711928  | 0.536720  | -0.499840    |
| 6    | 1.474292  | 1.274849  | 0.408709     |
| 1    | 4.262646  | -0.657413 | 0.547162     |
| 1    | 2.926585  | -1.983421 | -1.067766    |
| 1    | 0.668336  | -1.225841 | -1.725331    |
| 6    | -0.678457 | 0.980422  | -0.875528    |
| 1    | 1.067294  | 2.192027  | 0.823965     |
| 1    | 3.322684  | 1.436881  | 1.489779     |
| 1    | -0.690363 | 2.064235  | -1.032799    |
| 1    | -0.981401 | 0.507314  | -1.813815    |
| 6    | -1.727888 | 0.654558  | 0.198689     |
| 7    | -3.032806 | 1.149419  | -0.249210    |
| 6    | -1.761645 | -0.865346 | 0.456680     |
| 1    | -1.409778 | 1.125545  | 1.136087     |
| 1    | -3.713619 | 1.012386  | 0.491524     |
| 1    | -2.961661 | 2.153832  | -0.383601    |

|                                         |           |             |           |                    |
|-----------------------------------------|-----------|-------------|-----------|--------------------|
| 8                                       | -1.277851 | -1.266787   | 1.549202  |                    |
| 8                                       | -2.234368 | -1.614440   | -0.436063 |                    |
| SCF Energy                              |           | -554.332810 | (Hartree) |                    |
| zpe                                     |           | 0.177828    | (Hartree) |                    |
| Thermal correction to Enthalpy          |           |             |           | 0.189590 (Hartree) |
| Thermal correction to Gibbs Free Energy |           |             |           | 0.139775 (Hartree) |
| Enthalpy                                |           | -554.143220 | (Hartree) |                    |
| Free Energy                             |           | -554.193035 | (Hartree) |                    |

## 5

| Atom                                    | X         | Y            | Z (Angstrom) |                    |
|-----------------------------------------|-----------|--------------|--------------|--------------------|
| 6                                       | 2.136341  | 0.237785     | 0.089007     |                    |
| 6                                       | 1.450904  | -1.014703    | 0.014714     |                    |
| 6                                       | 0.048330  | -0.950914    | -0.269965    |                    |
| 6                                       | -0.649408 | 0.243389     | -0.440961    |                    |
| 6                                       | 0.079858  | 1.433805     | -0.340869    |                    |
| 6                                       | 1.435758  | 1.429636     | -0.073939    |                    |
| 6                                       | -2.138353 | 0.242656     | -0.686899    |                    |
| 6                                       | -2.971958 | 0.505532     | 0.577510     |                    |
| 6                                       | -4.456589 | 0.364564     | 0.277266     |                    |
| 6                                       | -0.684427 | -2.273656    | -0.381286    |                    |
| 8                                       | -1.481623 | -2.587464    | 0.552355     |                    |
| 8                                       | -0.470592 | -2.981349    | -1.394554    |                    |
| 8                                       | -2.593191 | -0.347117    | 1.659176     |                    |
| 1                                       | -2.236881 | -1.185930    | 1.298183     |                    |
| 1                                       | -4.759108 | 1.062832     | -0.508713    |                    |
| 1                                       | -5.049041 | 0.576387     | 1.170988     |                    |
| 1                                       | -4.682358 | -0.652954    | -0.057837    |                    |
| 1                                       | -2.773290 | 1.525601     | 0.921018     |                    |
| 1                                       | -2.447591 | -0.714862    | -1.115369    |                    |
| 1                                       | -2.399950 | 1.009842     | -1.419560    |                    |
| 17                                      | -0.711706 | 3.000702     | -0.576334    |                    |
| 1                                       | 1.969854  | 2.370575     | -0.001845    |                    |
| 6                                       | 3.625687  | 0.334603     | 0.327856     |                    |
| 8                                       | 4.031789  | 1.220762     | 1.132380     |                    |
| 8                                       | 2.026205  | -2.153607    | 0.229414     |                    |
| 8                                       | 4.389975  | -0.441176    | -0.309246    |                    |
| SCF Energy                              |           | -1336.006685 | (Hartree)    |                    |
| zpe                                     |           | 0.176794     | (Hartree)    |                    |
| Thermal correction to Enthalpy          |           |              |              | 0.194155 (Hartree) |
| Thermal correction to Gibbs Free Energy |           |              |              | 0.131470 (Hartree) |
| Enthalpy                                |           | -1335.812530 | (Hartree)    |                    |
| Free Energy                             |           | -1335.875215 | (Hartree)    |                    |

## Acid catalyzed ring closure

### Protonated acid

| Atom | X         | Y         | Z (Angstrom) |
|------|-----------|-----------|--------------|
| 6    | 0.735773  | -0.236647 | -0.391060    |
| 6    | 0.064418  | -1.465323 | -0.349658    |
| 6    | -1.291579 | -1.551988 | -0.110240    |
| 6    | -2.054557 | -0.404560 | 0.097533     |
| 6    | -1.427005 | 0.847552  | 0.044069     |
| 6    | -0.048336 | 0.902246  | -0.193240    |
| 17   | 0.935285  | -2.956369 | -0.642039    |
| 6    | -3.504506 | -0.473595 | 0.348403     |

|                                         |           |              |                    |
|-----------------------------------------|-----------|--------------|--------------------|
| 8                                       | -4.199797 | 0.519878     | 0.507248           |
| 8                                       | -2.065176 | 2.009772     | 0.212408           |
| 6                                       | 0.556033  | 2.251039     | -0.229146          |
| 8                                       | 0.353548  | 2.911660     | -1.536989          |
| 6                                       | 2.220426  | -0.144915    | -0.606853          |
| 6                                       | 3.035928  | -0.502481    | 0.651033           |
| 8                                       | 2.806872  | 0.432853     | 1.704334           |
| 8                                       | -3.995133 | -1.702404    | 0.386253           |
| 8                                       | 1.171834  | 2.867872     | 0.552013           |
| 6                                       | 4.519316  | -0.489084    | 0.345345           |
| 1                                       | 1.907106  | 0.330031     | 2.028509           |
| 1                                       | 4.751260  | -1.221787    | -0.430739          |
| 1                                       | 5.091532  | -0.742183    | 1.240577           |
| 1                                       | 4.832126  | 0.499184     | -0.004687          |
| 1                                       | 2.746533  | -1.500327    | 0.996441           |
| 1                                       | 2.506496  | 0.859271     | -0.928685          |
| 1                                       | 2.507846  | -0.831069    | -1.406400          |
| 1                                       | -1.773404 | -2.520495    | -0.085765          |
| 1                                       | -3.016147 | 1.820077     | 0.354933           |
| 1                                       | -4.949759 | -1.661122    | 0.543274           |
| 1                                       | -0.388497 | 2.635043     | -2.108359          |
| 1                                       | 0.472425  | 3.881137     | -1.523679          |
| SCF Energy                              |           | -1337.784907 | (Hartree)          |
| zpe                                     |           | 0.226780     | (Hartree)          |
| Thermal correction to Enthalpy          |           |              | 0.245711 (Hartree) |
| Thermal correction to Gibbs Free Energy |           |              | 0.180095 (Hartree) |
| Enthalpy                                |           | -1337.539196 | (Hartree)          |
| Free Energy                             |           | -1337.604812 | (Hartree)          |

**TS H<sub>2</sub>O loss**

| Atom | X         | Y         | Z (Angstrom) |
|------|-----------|-----------|--------------|
| 6    | -0.025591 | 0.878860  | -0.111594    |
| 6    | 0.770517  | -0.250358 | -0.376368    |
| 6    | 0.102549  | -1.473502 | -0.373066    |
| 6    | -1.257834 | -1.565707 | -0.130750    |
| 6    | -2.026272 | -0.436413 | 0.129017     |
| 6    | -1.408715 | 0.822723  | 0.133461     |
| 6    | 2.248977  | -0.134959 | -0.599280    |
| 6    | 3.068370  | -0.457931 | 0.667419     |
| 6    | 4.551255  | -0.391154 | 0.367461     |
| 17   | 0.973308  | -2.952726 | -0.700701    |
| 6    | -3.476830 | -0.523126 | 0.383335     |
| 8    | -3.965520 | -1.749466 | 0.331456     |
| 8    | -2.041103 | 1.965024  | 0.360384     |
| 6    | 0.579092  | 2.171841  | -0.078141    |
| 8    | 1.242051  | 2.961260  | 0.390391     |
| 8    | -4.163872 | 0.459506  | 0.619828     |
| 8    | -0.020839 | 2.959543  | -1.776880    |
| 8    | 2.794511  | 0.475195  | 1.711257     |
| 1    | 1.933499  | 0.279669  | 2.092303     |
| 1    | 4.811547  | -1.112014 | -0.410585    |
| 1    | 5.127404  | -0.627412 | 1.264608     |
| 1    | 4.829165  | 0.609236  | 0.022929     |
| 1    | 2.812448  | -1.464214 | 1.014351     |
| 1    | 2.515045  | 0.868438  | -0.941104    |
| 1    | 2.546076  | -0.829036 | -1.387596    |
| 1    | -1.737303 | -2.535956 | -0.143159    |

|                                         |           |              |           |          |           |
|-----------------------------------------|-----------|--------------|-----------|----------|-----------|
| 1                                       | -2.991234 | 1.768815     | 0.515325  |          |           |
| 1                                       | -4.918846 | -1.724424    | 0.500461  |          |           |
| 1                                       | -0.865477 | 2.639916     | -2.121590 |          |           |
| 1                                       | -0.123475 | 3.913194     | -1.654465 |          |           |
| SCF Energy                              |           | -1337.777559 | (Hartree) |          |           |
| zpe                                     |           | 0.224541     | (Hartree) |          |           |
| Thermal correction to Enthalpy          |           |              |           | 0.243796 | (Hartree) |
| Thermal correction to Gibbs Free Energy |           |              |           | 0.176903 | (Hartree) |
| Enthalpy                                |           | -1337.533763 | (Hartree) |          |           |
| Free Energy                             |           | -1337.600656 | (Hartree) |          |           |

### Acyl cation

| Atom                                    | X         | Y            | Z (Angstrom) |          |           |
|-----------------------------------------|-----------|--------------|--------------|----------|-----------|
| 6                                       | -1.325689 | -1.361504    | -0.028682    |          |           |
| 6                                       | 0.044187  | -1.402718    | -0.266603    |          |           |
| 6                                       | 0.776357  | -0.248061    | -0.459149    |          |           |
| 6                                       | 0.041956  | 0.970270     | -0.371220    |          |           |
| 6                                       | -1.358100 | 1.035374     | -0.129555    |          |           |
| 6                                       | -2.041059 | -0.175956    | 0.040628     |          |           |
| 17                                      | 0.815671  | -2.964119    | -0.313045    |          |           |
| 6                                       | 2.254251  | -0.228013    | -0.681317    |          |           |
| 6                                       | 3.016461  | -0.065515    | 0.649937     |          |           |
| 8                                       | 2.670964  | 1.183229     | 1.248669     |          |           |
| 6                                       | 0.752853  | 2.146059     | -0.514202    |          |           |
| 8                                       | 1.266485  | 3.131553     | -0.665197    |          |           |
| 8                                       | -2.052305 | 2.160196     | -0.058058    |          |           |
| 6                                       | -3.517236 | -0.296820    | 0.296580     |          |           |
| 8                                       | -4.263036 | 0.801181     | 0.311953     |          |           |
| 6                                       | 4.511495  | -0.192776    | 0.435801     |          |           |
| 8                                       | -4.033441 | -1.375352    | 0.481656     |          |           |
| 1                                       | -1.578260 | 2.989349     | -0.201221    |          |           |
| 1                                       | 2.674331  | -0.830165    | 1.351042     |          |           |
| 1                                       | 4.866149  | 0.576197     | -0.258150    |          |           |
| 1                                       | 5.037742  | -0.080727    | 1.385977     |          |           |
| 1                                       | 4.751448  | -1.172515    | 0.017210     |          |           |
| 1                                       | 2.564656  | -1.154196    | -1.164136    |          |           |
| 1                                       | -1.869673 | -2.288353    | 0.107931     |          |           |
| 1                                       | 2.535700  | 0.593659     | -1.347406    |          |           |
| 1                                       | -3.735412 | 1.604231     | 0.164008     |          |           |
| 1                                       | 3.244707  | 1.864052     | 0.881025     |          |           |
| SCF Energy                              |           | -1261.319396 | (Hartree)    |          |           |
| zpe                                     |           | 0.199779     | (Hartree)    |          |           |
| Thermal correction to Enthalpy          |           |              |              | 0.216988 | (Hartree) |
| Thermal correction to Gibbs Free Energy |           |              |              | 0.155314 | (Hartree) |
| Enthalpy                                |           | -1261.102408 | (Hartree)    |          |           |
| Free Energy                             |           | -1261.164082 | (Hartree)    |          |           |

### TS cyclization

| Atom | X         | Y         | Z (Angstrom) |  |  |
|------|-----------|-----------|--------------|--|--|
| 6    | 0.017630  | 1.484853  | -0.244437    |  |  |
| 6    | -0.790253 | 0.376457  | -0.412861    |  |  |
| 6    | -0.136679 | -0.884823 | -0.334357    |  |  |
| 6    | 1.257291  | -1.035482 | -0.108194    |  |  |
| 6    | 2.019985  | 0.130615  | 0.050816     |  |  |
| 6    | 1.384176  | 1.359269  | -0.022801    |  |  |
| 6    | -2.271568 | 0.443994  | -0.602068    |  |  |
| 6    | -2.994053 | -0.015831 | 0.675100     |  |  |



|                                         |           |              |           |          |           |
|-----------------------------------------|-----------|--------------|-----------|----------|-----------|
| 6                                       | -4.491461 | 0.183188     | 0.577299  |          |           |
| 6                                       | -0.881862 | -2.049790    | -0.491403 |          |           |
| 8                                       | -1.241576 | -3.085161    | -0.745712 |          |           |
| 8                                       | 1.883004  | -2.202421    | -0.033340 |          |           |
| 6                                       | 3.502477  | 0.159859     | 0.293066  |          |           |
| 8                                       | 4.084170  | 1.204733     | 0.479305  |          |           |
| 17                                      | -0.645755 | 3.096662     | -0.294139 |          |           |
| 8                                       | -2.658823 | -1.390697    | 0.909117  |          |           |
| 8                                       | 4.184479  | -0.979334    | 0.296237  |          |           |
| 1                                       | 1.357821  | -2.997160    | -0.189404 |          |           |
| 1                                       | -2.595191 | 0.534931     | 1.529442  |          |           |
| 1                                       | -4.898051 | -0.369965    | -0.275081 |          |           |
| 1                                       | -4.978751 | -0.163255    | 1.491045  |          |           |
| 1                                       | -4.717502 | 1.242883     | 0.442360  |          |           |
| 1                                       | -2.572241 | 1.460980     | -0.845136 |          |           |
| 1                                       | 1.987862  | 2.250354     | 0.097592  |          |           |
| 1                                       | -2.581260 | -0.201673    | -1.430623 |          |           |
| 1                                       | 3.610014  | -1.749242    | 0.150295  |          |           |
| 1                                       | -3.338996 | -1.941928    | 0.504068  |          |           |
| SCF Energy                              |           | -1261.318964 | (Hartree) |          |           |
| zpe                                     |           | 0.199182     | (Hartree) |          |           |
| Thermal correction to Enthalpy          |           |              |           | 0.215742 | (Hartree) |
| Thermal correction to Gibbs Free Energy |           |              |           | 0.155718 | (Hartree) |
| Enthalpy                                |           | -1261.103222 | (Hartree) |          |           |
| Free Energy                             |           | -1261.163246 | (Hartree) |          |           |

### Protonated lactone

| Atom       | X         | Y            | Z (Angstrom) |  |  |
|------------|-----------|--------------|--------------|--|--|
| 6          | -2.251300 | 0.920443     | -0.123063    |  |  |
| 6          | -0.781672 | 0.627908     | -0.054269    |  |  |
| 6          | -0.317211 | -0.703537    | -0.043142    |  |  |
| 6          | -1.231154 | -1.822040    | -0.128864    |  |  |
| 8          | -2.600238 | -1.451364    | -0.225876    |  |  |
| 6          | -3.102457 | -0.170921    | 0.463610     |  |  |
| 6          | 0.167124  | 1.638154     | -0.040720    |  |  |
| 6          | 1.522545  | 1.354934     | 0.002555     |  |  |
| 6          | 1.992934  | 0.050394     | 0.029722     |  |  |
| 6          | 1.063685  | -1.000952    | 0.005007     |  |  |
| 6          | 3.479012  | -0.131732    | 0.070338     |  |  |
| 8          | 4.234963  | 0.815543     | 0.098198     |  |  |
| 8          | 1.528926  | -2.251314    | 0.022743     |  |  |
| 17         | -0.320303 | 3.314988     | -0.091319    |  |  |
| 8          | -0.994516 | -2.992192    | -0.169736    |  |  |
| 6          | -4.568055 | -0.074209    | 0.173819     |  |  |
| 8          | 3.976099  | -1.364706    | 0.074635     |  |  |
| 1          | 2.243030  | 2.163376     | 0.014896     |  |  |
| 1          | -2.886424 | -0.351556    | 1.516013     |  |  |
| 1          | -2.485417 | 1.828871     | 0.434246     |  |  |
| 1          | -2.532734 | 1.095734     | -1.167039    |  |  |
| 1          | -4.939698 | 0.813967     | 0.690011     |  |  |
| 1          | -4.752262 | 0.034976     | -0.895920    |  |  |
| 1          | -5.101427 | -0.942538    | 0.564197     |  |  |
| 1          | 0.814817  | -2.911222    | -0.038384    |  |  |
| 1          | -3.186602 | -2.229836    | -0.142090    |  |  |
| 1          | 3.269292  | -2.034958    | 0.046818     |  |  |
| SCF Energy |           | -1261.348148 | (Hartree)    |  |  |
| zpe        |           | 0.202016     | (Hartree)    |  |  |

|                                         |              |           |
|-----------------------------------------|--------------|-----------|
| Thermal correction to Enthalpy          | 0.217871     | (Hartree) |
| Thermal correction to Gibbs Free Energy | 0.159735     | (Hartree) |
| Enthalpy                                | -1261.130277 | (Hartree) |
| Free Energy                             | -1261.188413 | (Hartree) |
